# Supplementary material for: Detecting Zn(II) Ions in Live Cells with Near-Infrared Fluorescent Probes
Source: PubMed Central journal article supplement (PMC6515227; doi:10.3390/molecules24081592), 2019-04-22
Supplement: molecules-24-01592-s001.pdf [file molecules-24-01592-s001.pdf]

# Detecting Zn(II) Ions in Live Cells with Near-Infrared Fluorescent probes

Mingxi Fang,<sup>1</sup> Shuai Xia,<sup>1</sup> Jianheng Bi,<sup>1</sup> Travis P. Wigstrom,<sup>1</sup> Loredana Valenzano,<sup>1</sup> Jianbo Wang,<sup>1,2,\*</sup> Marina Tanasova,<sup>1</sup> Rudy L. Luck<sup>1,\*</sup> and Haiying Liu<sup>1,\*</sup>

<sup>1</sup> Department of Chemistry, Michigan Technological University, 1400 Townsend Drive, Houghton, MI 49931, USA; [mfang@mtu.edu](mailto:mfang@mtu.edu) (M.F.); [shuaix@mtu.edu](mailto:shuaix@mtu.edu) (S.X.); [jbi1@mtu.edu](mailto:jbi1@mtu.edu) (J.B.); [tpwigstr@mtu.edu](mailto:tpwigstr@mtu.edu) (T.P.W.); [lvalenza@mtu.edu](mailto:lvalenza@mtu.edu) (L.V.); [mtanasov@mtu.edu](mailto:mtanasov@mtu.edu) (M.T.)

<sup>2</sup> College of Biological, Chemical Sciences and Engineering, Jiaying University, Jiaying 314001, China

\* Correspondence: [wjb4207@mail.ustc.edu.cn](mailto:wjb4207@mail.ustc.edu.cn) (J.W.); [rluck@mtu.edu](mailto:rluck@mtu.edu) (R.L.L.); [hyluu@mtu.edu](mailto:hyluu@mtu.edu) (H.L.)

Received: 25 March 2019.; Accepted: 04 April 2019.; Published: date

## Contents

|                                                                                                                                                                                                                                                                                                                                                                                                                                      |    |
|--------------------------------------------------------------------------------------------------------------------------------------------------------------------------------------------------------------------------------------------------------------------------------------------------------------------------------------------------------------------------------------------------------------------------------------|----|
| 1. HRMS spectra of fluorescent probes <b>A</b> and <b>B</b> .....                                                                                                                                                                                                                                                                                                                                                                    | 4  |
| <b>Figure S1.</b> High resolution mass spectrum of compound <b>4</b> .....                                                                                                                                                                                                                                                                                                                                                           | 4  |
| <b>Figure S2.</b> High resolution mass spectrum of probe <b>A</b> .....                                                                                                                                                                                                                                                                                                                                                              | 4  |
| <b>Figure S3.</b> High resolution mass spectrum of compound <b>9</b> .....                                                                                                                                                                                                                                                                                                                                                           | 5  |
| <b>Figure S4.</b> High resolution mass Spectrum of probe <b>B</b> .....                                                                                                                                                                                                                                                                                                                                                              | 5  |
| <b>Figure S5.</b> High resolution mass spectrum of compound <b>8</b> .....                                                                                                                                                                                                                                                                                                                                                           | 6  |
| 2. ESI-MS of probes <b>A</b> binding with Zn(II) ions.....                                                                                                                                                                                                                                                                                                                                                                           | 7  |
| <b>Figure S6.</b> ESI-MS of probe <b>A</b> binding with Zn <sup>2+</sup> .....                                                                                                                                                                                                                                                                                                                                                       | 7  |
| 3. Determination of binding constant of probe <b>A</b> .....                                                                                                                                                                                                                                                                                                                                                                         | 7  |
| <b>Figure S7.</b> Benesi-Hildbrand equation plot of 5 μM fluorescent probe <b>A</b> with Zn(II) obtained from fluorescence titration data. The binding constant was determined to be 9.5×10 <sup>5</sup> M <sup>-1</sup> .....                                                                                                                                                                                                       | 8  |
| 4. Determination of detection limit of probe <b>A</b> .....                                                                                                                                                                                                                                                                                                                                                                          | 8  |
| <b>Figure S8.</b> Fluorescence intensities of 10 μM fluorescent probe <b>A</b> at 701 nm as a function of the concentrations of Zn(II) in HEPES buffer solution (10 mM, pH 7.0). The detection limit was then determined to be 4.5×10 <sup>-10</sup> M.....                                                                                                                                                                          | 9  |
| 5. Selectivity and photostability of probes <b>A</b> and <b>B</b> .....                                                                                                                                                                                                                                                                                                                                                              | 10 |
| <b>Figure S9.</b> (a) Fluorescence responses of probes <b>A</b> to Zn(II) ions over other metal ions, (b) Fluorescence responses of probe <b>B</b> to Zn(II) ions and other metal ions.....                                                                                                                                                                                                                                          | 10 |
| <b>Figure S10.</b> (a) Normalized photostability of probes <b>A</b> and (b) probe <b>B</b> with 2.0 μM Zn(II) as a function of time in 180 minutes under excitation (635 nm) in 10 mM HEPES buffer solutions (pH 7.0). .....                                                                                                                                                                                                         | 10 |
| 6. Job's plot.....                                                                                                                                                                                                                                                                                                                                                                                                                   | 11 |
| <b>Figure S11.</b> Job's plot of the complexation of fluorescent probe <b>A</b> with Zn(II) was plotted as function of the different molar ratio [A]/([A]+[Zn(II)]) by fluorescence method, indicating that there is 1:1 stoichiometry between Zn(II) and probe <b>A</b> . The total concentration of probe <b>A</b> and Zn(II) was constantly maintained in 2×10 <sup>-5</sup> M in the HEPES buffer solution (10mM, pH 7.0). ..... | 11 |
| 7. Fluorescence quantum yield.....                                                                                                                                                                                                                                                                                                                                                                                                   | 11 |

|    |                                                                                                                                                                                                                                                                                                                                                                                                                                                                                                                               |    |
|----|-------------------------------------------------------------------------------------------------------------------------------------------------------------------------------------------------------------------------------------------------------------------------------------------------------------------------------------------------------------------------------------------------------------------------------------------------------------------------------------------------------------------------------|----|
| 8. | In-vitro cell imaging and intracellular detection of Zn(II) by using probe B .....                                                                                                                                                                                                                                                                                                                                                                                                                                            | 12 |
|    | <b>Figure S12.</b> Fluorescence images of fluorescent probe <b>B</b> with concentration at 0.1 $\mu\text{M}$ , 0.5 $\mu\text{M}$ and 1.0 $\mu\text{M}$ in HeLa cells. Cells were incubated with of probe <b>B</b> with specific concentration for 30 min. Cells were then supplemented with either 10 $\mu\text{M}$ of zinc (II) chloride or 10 $\mu\text{M}$ each of zinc (II) chloride plus sodium pyrithione (Pyr) for 30 min before acquiring images. Scale bar: 50 $\mu\text{m}$ . $\lambda_{\text{exc}}$ : 635 nm. .... | 12 |
| 9. | Theoretical Calculation Results.....                                                                                                                                                                                                                                                                                                                                                                                                                                                                                          | 12 |
|    | Theoretical Data for probe <b>A</b> + $\text{Zn}(\text{OH}_2)^{2+}$ . ....                                                                                                                                                                                                                                                                                                                                                                                                                                                    | 12 |
|    | <b>Figure S13.</b> GaussView representation of probe <b>A</b> + $\text{Zn}(\text{OH}_2)^{2+}$ .....                                                                                                                                                                                                                                                                                                                                                                                                                           | 12 |
|    | <b>Figure S14.</b> Illustration of the computational results for probe <b>A</b> + $\text{Zn}(\text{OH}_2)^{2+}$ . ....                                                                                                                                                                                                                                                                                                                                                                                                        | 13 |
|    | <b>Table S1.</b> Calculated atomic coordinates for probe <b>A</b> + $\text{Zn}(\text{OH}_2)^{2+}$ . ....                                                                                                                                                                                                                                                                                                                                                                                                                      | 13 |
|    | <b>Figure S15.</b> Calculated IR spectrum for probe <b>A</b> + $\text{Zn}(\text{OH}_2)^{2+}$ . ....                                                                                                                                                                                                                                                                                                                                                                                                                           | 17 |
|    | <b>Figure S16.</b> Calculated UV-Vis spectrum for probe <b>A</b> + $\text{Zn}(\text{OH}_2)^{2+}$ .....                                                                                                                                                                                                                                                                                                                                                                                                                        | 17 |
|    | <b>Table S2.</b> Excitation energies and oscillator strengths listing for probe <b>A</b> + $\text{Zn}(\text{OH}_2)^{2+}$ .....                                                                                                                                                                                                                                                                                                                                                                                                | 18 |
|    | Theoretical Data for probe <b>A</b> + $\text{Zn}(\text{OH}_2)_2^{2+}$ . ....                                                                                                                                                                                                                                                                                                                                                                                                                                                  | 19 |
|    | <b>Figure S17.</b> GaussView representation of probe <b>A</b> + $\text{Zn}(\text{OH}_2)_2^{2+}$ .....                                                                                                                                                                                                                                                                                                                                                                                                                         | 19 |
|    | <b>Figure S18.</b> Illustration of the computational results for probe <b>A</b> + $\text{Zn}(\text{OH}_2)_2^{2+}$ . ....                                                                                                                                                                                                                                                                                                                                                                                                      | 19 |
|    | <b>Table S3.</b> Calculated atomic coordinates for probe <b>A</b> + $\text{Zn}(\text{OH}_2)_2^{2+}$ . ....                                                                                                                                                                                                                                                                                                                                                                                                                    | 19 |
|    | <b>Figure S19.</b> Calculated IR spectrum for probe <b>A</b> + $\text{Zn}(\text{OH}_2)_2^{2+}$ . ....                                                                                                                                                                                                                                                                                                                                                                                                                         | 23 |
|    | <b>Figure S20.</b> Calculated UV-Vis spectrum for probe <b>A</b> + $\text{Zn}(\text{OH}_2)_2^{2+}$ . ....                                                                                                                                                                                                                                                                                                                                                                                                                     | 23 |
|    | <b>Table S4.</b> Excitation energies and oscillator strengths listing for probe <b>A</b> + $\text{Zn}(\text{OH}_2)_2^{2+}$ . ....                                                                                                                                                                                                                                                                                                                                                                                             | 24 |
|    | Theoretical Data for probe <b>B</b> + $\text{Zn}(\text{OH}_2)^{2+}$ .....                                                                                                                                                                                                                                                                                                                                                                                                                                                     | 25 |
|    | <b>Figure S21.</b> GaussView representation of probe <b>B</b> + $\text{Zn}(\text{OH}_2)^{2+}$ . ....                                                                                                                                                                                                                                                                                                                                                                                                                          | 25 |
|    | <b>Figure S22.</b> Illustration of the computational results for probe <b>B</b> + $\text{Zn}(\text{OH}_2)^{2+}$ .....                                                                                                                                                                                                                                                                                                                                                                                                         | 25 |
|    | <b>Table S5.</b> Calculated atomic coordinates for probe <b>B</b> + $\text{Zn}(\text{OH}_2)^{2+}$ .....                                                                                                                                                                                                                                                                                                                                                                                                                       | 25 |
|    | <b>Figure S23.</b> Calculated UV-Vis spectrum for probe <b>B</b> + $\text{Zn}(\text{OH}_2)^{2+}$ . ....                                                                                                                                                                                                                                                                                                                                                                                                                       | 29 |
|    | <b>Figure S24.</b> Calculated UV-Vis spectrum for probe <b>B</b> + $\text{Zn}(\text{OH}_2)^{2+}$ . ....                                                                                                                                                                                                                                                                                                                                                                                                                       | 29 |
|    | <b>Table S6.</b> Excitation energies and oscillator strengths listing for probe <b>B</b> + $\text{Zn}(\text{OH}_2)^{2+}$ .....                                                                                                                                                                                                                                                                                                                                                                                                | 29 |
|    | Theoretical Data for probe <b>B</b> + $\text{Zn}(\text{OH}_2)_2^{2+}$ .....                                                                                                                                                                                                                                                                                                                                                                                                                                                   | 30 |
|    | <b>Figure S25.</b> GaussView representation of probe <b>B</b> + $\text{Zn}(\text{OH}_2)_2^{2+}$ . ....                                                                                                                                                                                                                                                                                                                                                                                                                        | 30 |
|    | <b>Figure S26.</b> Illustration of the computational results for probe <b>B</b> + $\text{Zn}(\text{OH}_2)_2^{2+}$ . ....                                                                                                                                                                                                                                                                                                                                                                                                      | 31 |
|    | <b>Table S7.</b> Computational results for probe <b>B</b> + $\text{Zn}(\text{OH}_2)_2^{2+}$ .....                                                                                                                                                                                                                                                                                                                                                                                                                             | 31 |
|    | <b>Figure S27.</b> Calculated IR spectrum for probe <b>B</b> + $\text{Zn}(\text{OH}_2)_2^{2+}$ .....                                                                                                                                                                                                                                                                                                                                                                                                                          | 34 |
|    | <b>Figure S28.</b> Calculated UV-Vis spectrum for probe <b>B</b> + $\text{Zn}(\text{OH}_2)_2^{2+}$ . ....                                                                                                                                                                                                                                                                                                                                                                                                                     | 34 |
|    | <b>Table S8.</b> Excitation energies and oscillator strengths listing for probe <b>B</b> + $\text{Zn}(\text{OH}_2)_2^{2+}$ .....                                                                                                                                                                                                                                                                                                                                                                                              | 35 |

|                                                                                                                                                                                                                                                                                                                         |    |
|-------------------------------------------------------------------------------------------------------------------------------------------------------------------------------------------------------------------------------------------------------------------------------------------------------------------------|----|
| <b>Table S9.</b> Calculated electronic transitions (nm) and corresponding oscillator strengths (f) and their percentage contribution to the UV/Vis spectra. ....                                                                                                                                                        | 36 |
| <b>Table S10.</b> Drawings of the HOMO-1/LUMO states for Intermediates <b>4</b> and <b>9</b> , and for probes <b>A</b> and <b>B</b> . ....                                                                                                                                                                              | 37 |
| <b>Table S11.</b> Drawings of the HOMO-1/LUMO distributions for the Zn complexes explored in this work. Note that exceptions are observed for (b) and (f), corresponding to Zn complex <b>4</b> , for which the excitation is predicted as an HOMO/LUMO transition.....                                                 | 37 |
| <b>Table S12.</b> Calculated electronic transitions (nm) and corresponding oscillator strengths (f) and their percentage contribution to the UV/Vis spectra for the [Zn(OH <sub>2</sub> )] <sup>2+</sup> and [Zn(OH <sub>2</sub> ) <sub>2</sub> ] <sup>2+</sup> moieties attached to probes <b>A</b> and <b>B</b> ..... | 38 |
| <b>Figure S29.</b> Calculated coordination bond distances (Å) for probes <b>A</b> and <b>B</b> with Zn(OH <sub>2</sub> ) <sup>2+</sup> and Zn(OH <sub>2</sub> ) <sub>2</sub> <sup>2+</sup> . ....                                                                                                                       | 38 |
| 10. Comparison of Zn concentration via atomic absorption spectroscopy and fluorescence change .....                                                                                                                                                                                                                     | 39 |
| <b>Figure S30.</b> Calibration curve of atomic absorption spectroscopy of Zn element. ....                                                                                                                                                                                                                              | 39 |
| <b>Figure S31.</b> Absorption of stock solution samples obtained in atomic absorption spectroscopy and calibration curve; (a) Zn <sup>2+</sup> concentration of sample <b>1</b> was calculated to be 0.06mg/L= 0.923μM, (b) sample <b>2</b> was calculated to be 0.0438mg/L= 0.673μM. ....                              | 40 |
| <b>Figure S32.</b> Determination of Zn <sup>2+</sup> concentration according to fluorescence changes.....                                                                                                                                                                                                               | 40 |
| 11. References.....                                                                                                                                                                                                                                                                                                     | 41 |

# 1. HRMS spectra of fluorescent probes A and B

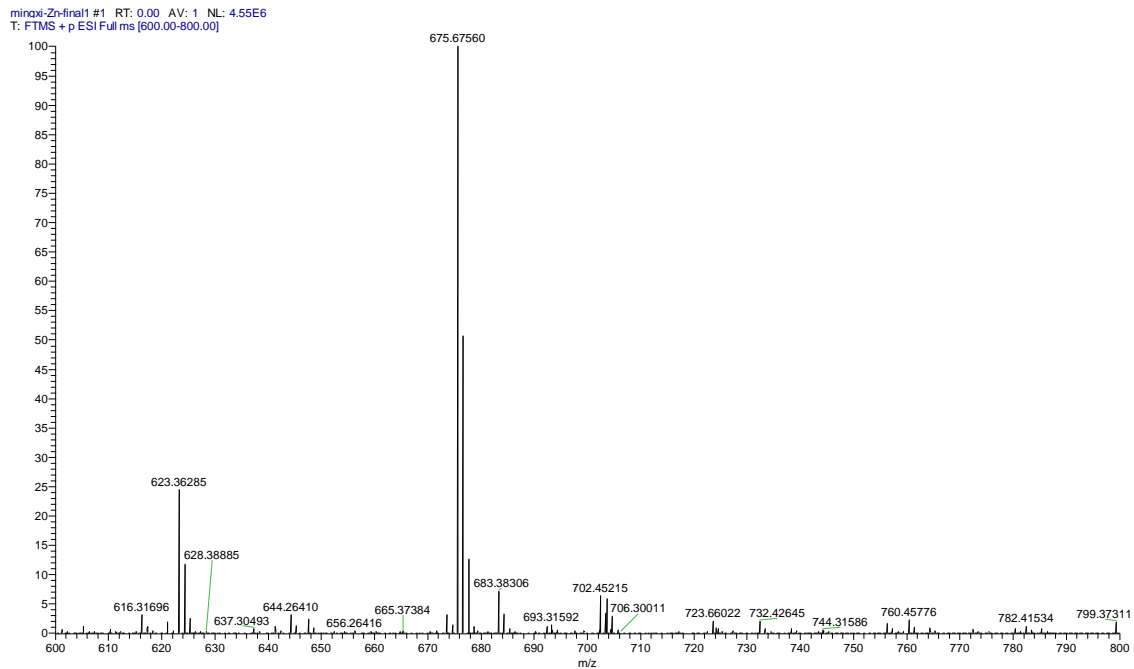

Figure S1. High resolution mass spectrum of compound 4.

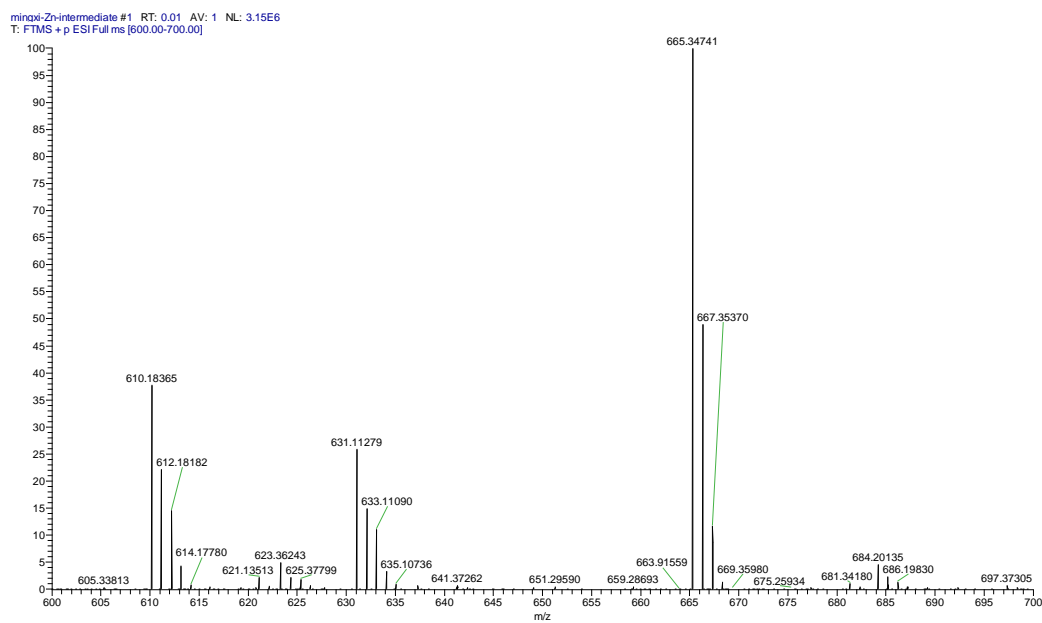

Figure S2. High resolution mass spectrum of probe A.

Zn2-inter\_620-630 #2-50 RT: 0.02-0.73 AV: 49 NL: 1.85E6  
T: FTMS + p ESI Fullms [620.00-630.00]

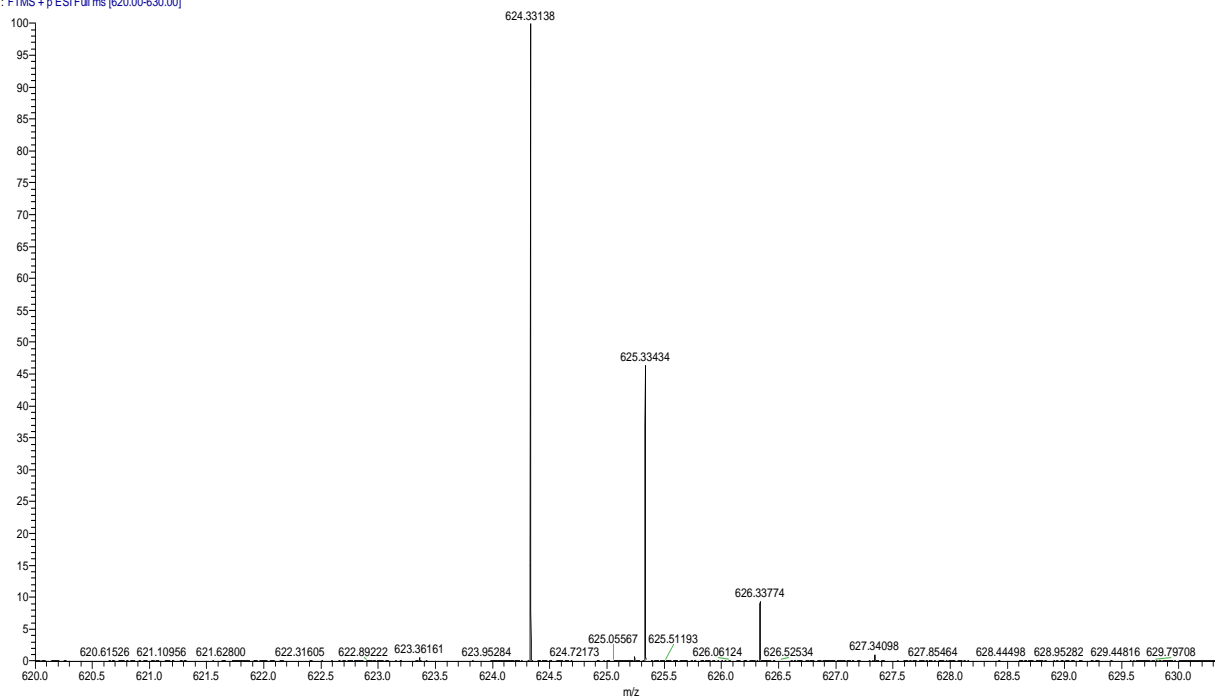

Figure S3. High resolution mass spectrum of compound 9.

Zn2\_650-700 #1 RT: 0.01 AV: 1 NL: 1.29E6  
T: FTMS + p ESI Fullms [650.00-700.00]

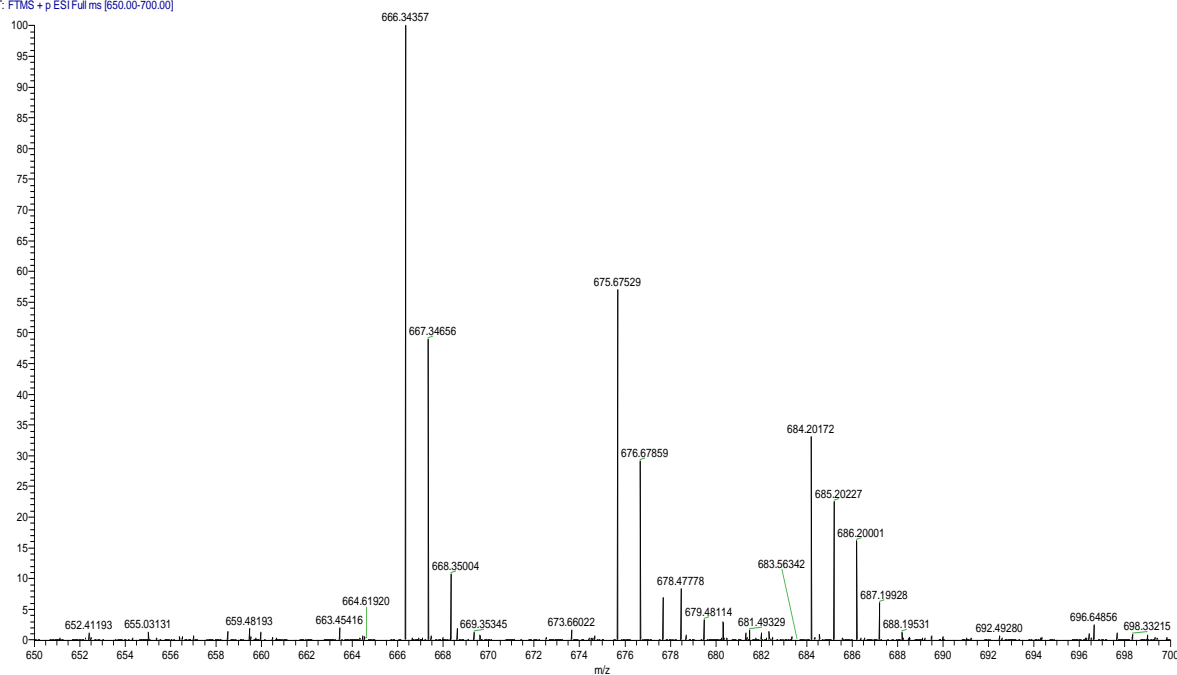

Figure S4. High resolution mass Spectrum of probe B.

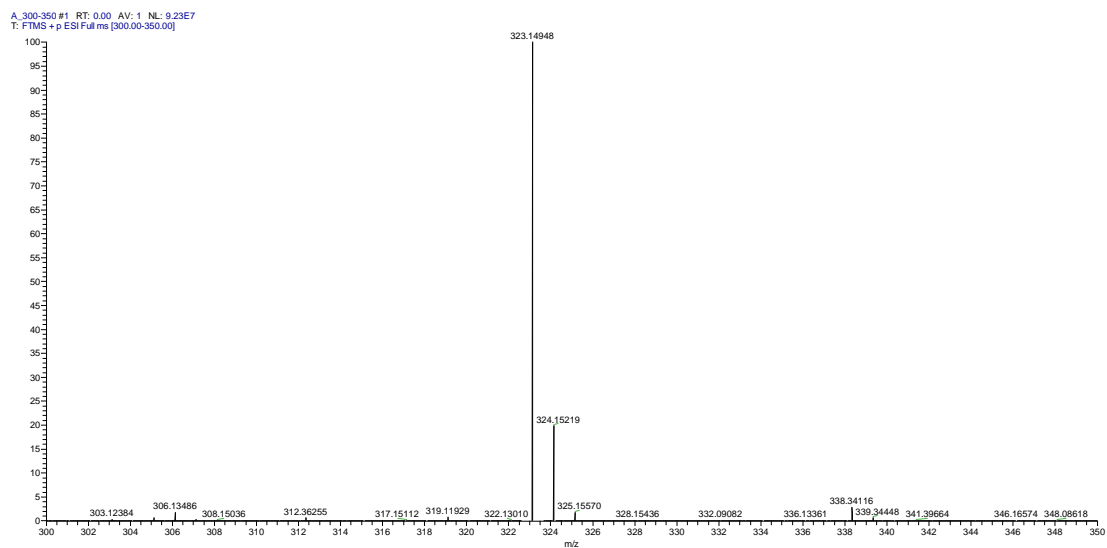

**Figure S5.** High resolution mass spectrum of compound **8**.

## 2. ESI-MS of probes A binding with Zn(II) ions

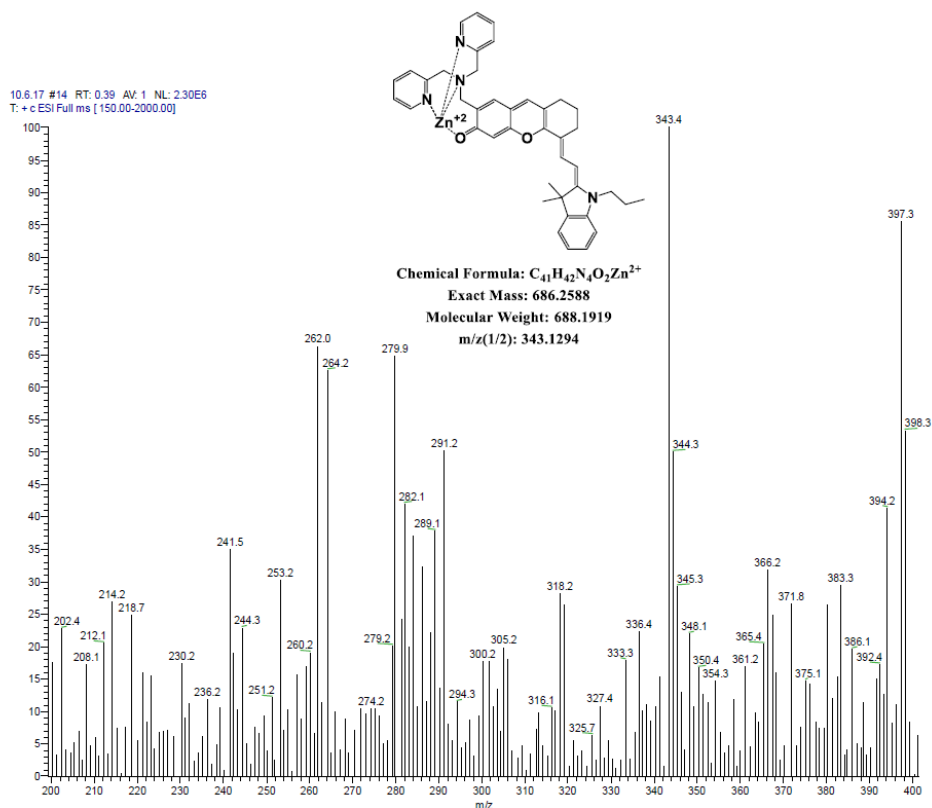

**Figure S6.** ESI-MS of probe **A** binding with  $Zn^{2+}$

## 3. Determination of binding constant of probe A

Binding constant ( $K_a$ ) was calculated by fluorescence method based on the modified Benesi-Hildbrand equation/plot. Fluorescent intensities were collected from the titration curves of the fluorescent probes **A** and **B** in the presence of  $Zn(II)$ .  $K_a$  was determined from the slope of the fitting line and the intercept by using the following equation<sup>[1]</sup>:

$$\frac{1}{F - F_{min}} = \frac{1}{K_a[L](F_{max} - F_{min})} + \frac{1}{F_{max} - F_{min}}$$

Where  $F_{min}$ ,  $F$ , and  $F_{max}$  are the fluorescence intensities of receptor considered in the absence of  $Zn(II)$ , at an intermediate  $Zn(II)$  concentration, and at a concentration of complete saturation.  $K_a$  is the binding constant and  $[L]$  is the  $Zn(II)$  concentration, respectively.  $K_a$  is determined from the slope and intercept of the linear regression equation. According to the plot of  $\frac{1}{F - F_{min}}$  versus  $\frac{1}{[L]}$ , the good linear relationship ( $R=0.99$ ) of fluorescent probes **A** and **B** also indicated the formation of 1:1 complexation.

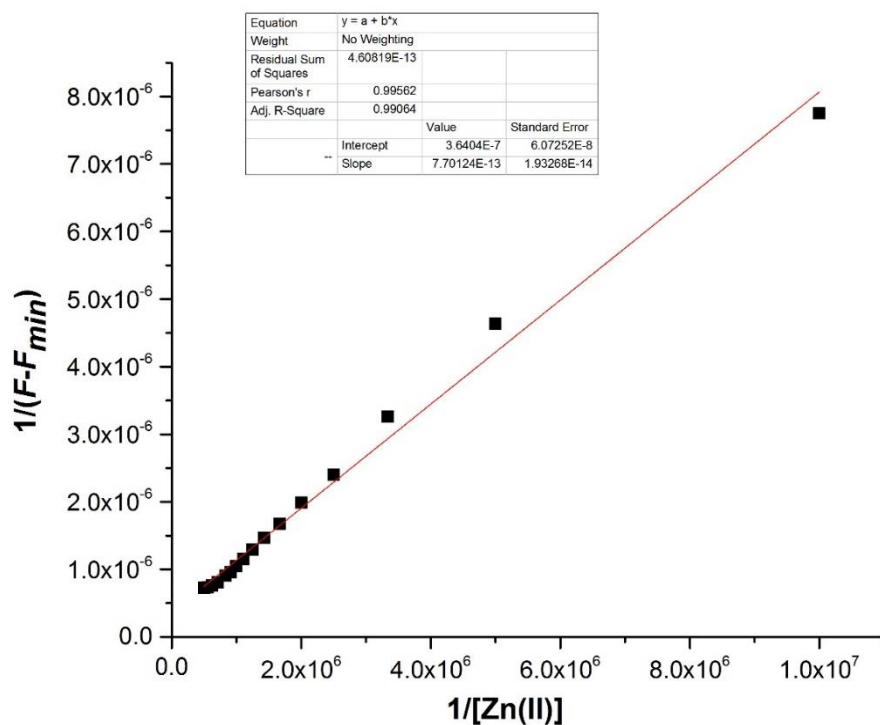

**Figure S7.** Benesi-Hildbrand equation plot of 5  $\mu\text{M}$  fluorescent probe **A** with Zn(II) obtained from fluorescence titration data. The binding constant was determined to be  $9.5 \times 10^5 \text{ M}^{-1}$ .

#### 4. Determination of detection limit of probe A

Detection limit (DL) of fluorescent probe **A** or **B** was calculated based on fluorescence titration by using the following formula<sup>[2]</sup>:

$$DL = K \times \frac{\sigma}{s}$$

Where  $K=3$ ;  $s$  is the slope of the linear regression equation;  $\delta$  is the standard deviation of the blank solution, which was measured 20 times to determine the background noise.



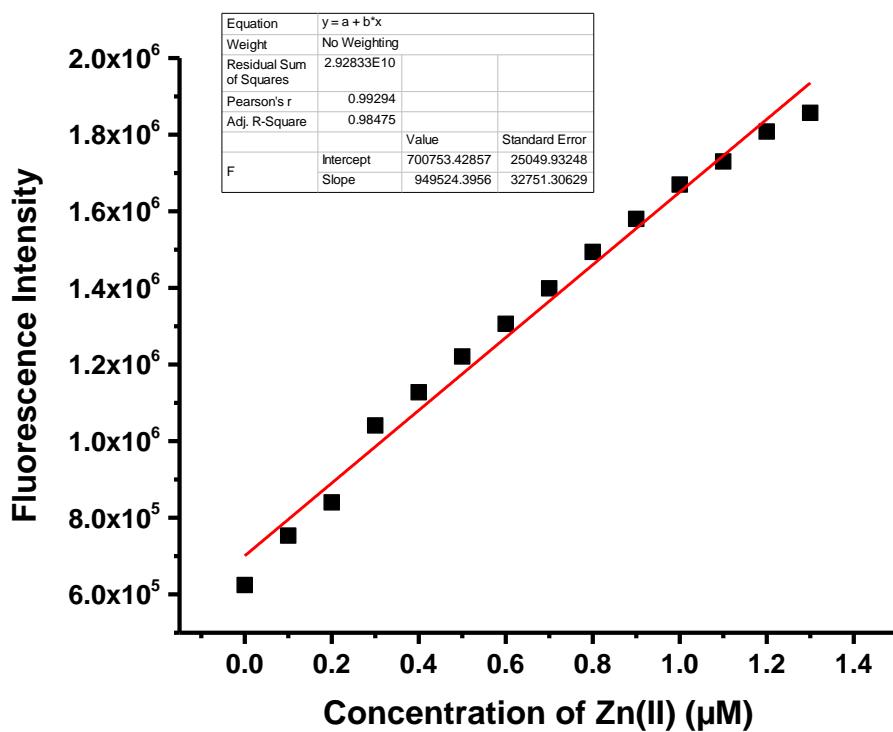

**Figure S8.** Fluorescence intensities of 10  $\mu\text{M}$  fluorescent probe A at 701 nm as a function of the concentrations of Zn(II) in HEPES buffer solution (10 mM, pH 7.0). The detection limit was then determined to be  $4.5 \times 10^{-10}$  M.

## 5. Selectivity and photostability of probes A and B

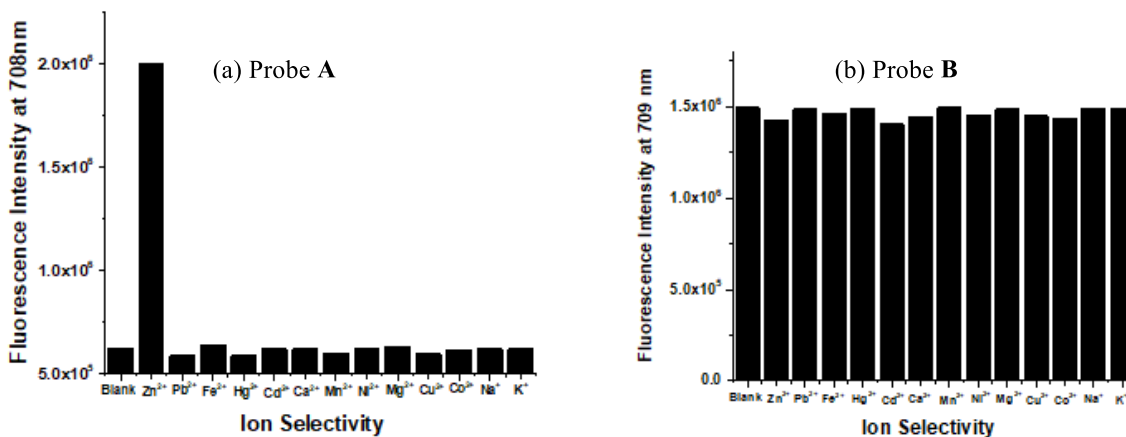

**Figure S9.** (a) Fluorescence responses of probes **A** to Zn(II) ions over other metal ions, (b) Fluorescence responses of probe **B** to Zn(II) ions and other metal ions.

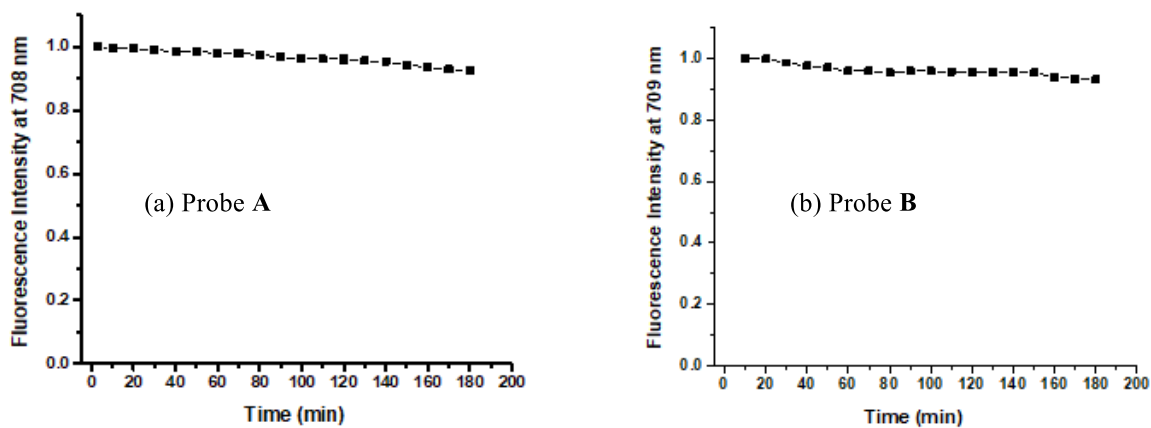

**Figure S10.** (a) Normalized photostability of probes **A** and (b) probe **B** with  $2.0 \mu\text{M}$  Zn(II) as a function of time in 180 minutes under excitation (635 nm) in 10 mM HEPES buffer solutions (pH 7.0).

## 6. Job's plot

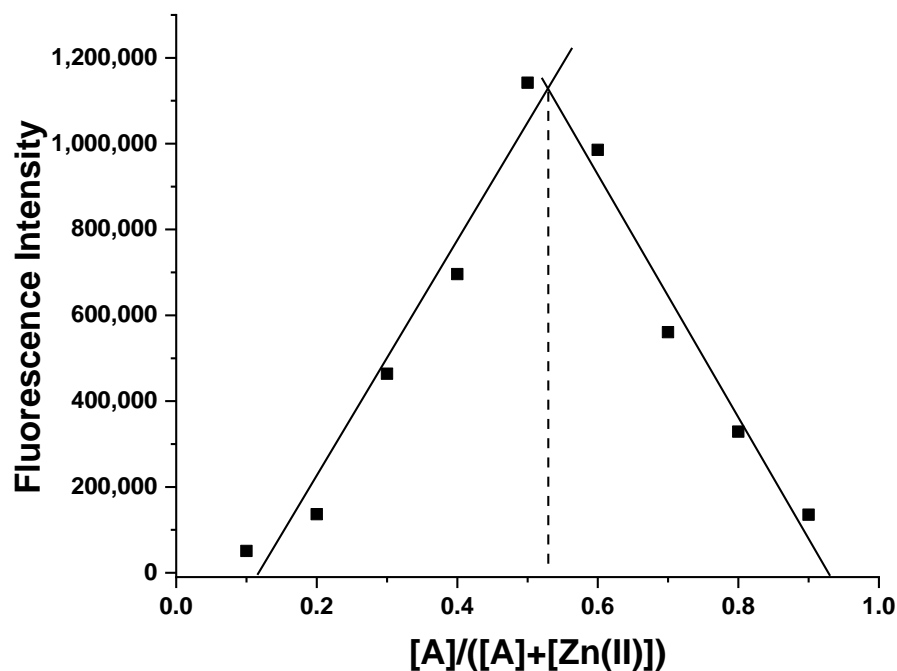

**Figure S11.** Job's plot of the complexation of fluorescent probe A with Zn(II) was plotted as function of the different molar ratio  $[A]/([A]+[Zn(II)])$  by fluorescence method, indicating that there is 1:1 stoichiometry between Zn(II) and probe A. The total concentration of probe A and Zn(II) was constantly maintained in  $2 \times 10^{-5} M$  in the HEPES buffer solution (10mM, pH 7.0).

## 7. Fluorescence quantum yield

The quantum yields were calculated using Hunan Dye (QY = 0.41 in ethanol) as reference according to the method reported in literature<sup>[3]</sup>.

$$QY = \frac{QY_r \times I_x \times A_r \times n_x^2}{I_r \times A_x \times n_r^2}$$

QY<sub>r</sub>: Quantum yield of reference compound.

A<sub>x</sub>: Absorbance value of probe at excitation wavelength

I<sub>x</sub>: Integration of probe's emission spectra

A<sub>r</sub>: Absorbance value of the standard at excitation wavelength

I<sub>r</sub>: Integration of standard emission spectra

n<sub>s</sub>: Refraction rate of reference compound solvent.

n<sub>x</sub>: Refractive index of probe solvent.

## 8. In-vitro cell imaging and intracellular detection of Zn(II) by using probe B

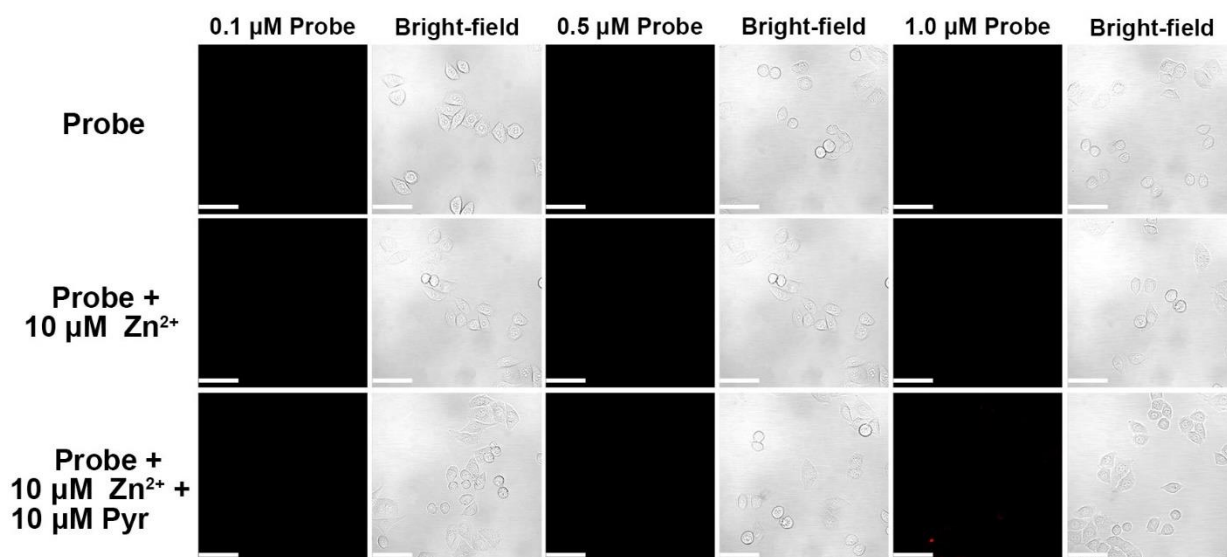

**Figure S12.** Fluorescence images of fluorescent probe **B** with concentration at 0.1  $\mu\text{M}$ , 0.5  $\mu\text{M}$  and 1.0  $\mu\text{M}$  in HeLa cells. Cells were incubated with of probe **B** with specific concentration for 30 min. Cells were then supplemented with either 10  $\mu\text{M}$  of zinc (II) chloride or 10  $\mu\text{M}$  each of zinc (II) chloride plus sodium pyrithione (Pyr) for 30 min before acquiring images. Scale bar: 50  $\mu\text{m}$ .  $\lambda_{\text{ex}}$ : 635 nm.

## 9. Theoretical Calculation Results

Theoretical Data for probe **A** + Zn(OH<sub>2</sub>)<sup>2+</sup>.

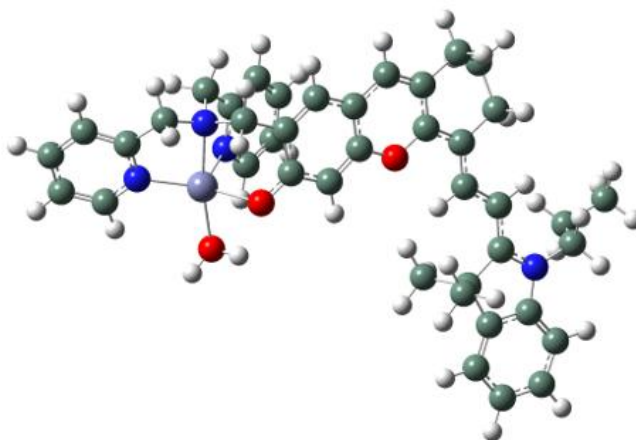

**Figure S13.** GaussView representation of probe **A** + Zn(OH<sub>2</sub>)<sup>2+</sup>.

| zna1 (Optimization completed)                       |                    |              |
|-----------------------------------------------------|--------------------|--------------|
| /home/rluck/calculation/liu/mingxi/superior/zna1... |                    |              |
| File Type                                           | .log               |              |
| Calculation Type                                    | FREQ               |              |
| Calculation Method                                  | RAPFD              |              |
| Basis Set                                           | 6-311+G(2d,p)      |              |
| Charge                                              | 2                  |              |
| Spin                                                | Singlet            |              |
| Solvation                                           | scrf=solvent=water |              |
| E(RAPFD)                                            | -3811.478986       | Hartree      |
| RMS Gradient Norm                                   | 0.000004           | Hartree/Bohr |
| Imaginary Freq                                      |                    |              |
| Dipole Moment                                       | 17.364108          | Debye        |
| Point Group                                         | C1                 |              |
| Job cpu time: 21 days 14 hours 29 minutes 3...      |                    |              |

Figure S14. Illustration of the computational results for probe A + Zn(OH<sub>2</sub>)<sup>2+</sup>.

Table S1. Calculated atomic coordinates for probe A + Zn(OH<sub>2</sub>)<sup>2+</sup>.

| Row | Symbol | X        | Y        | Z        |
|-----|--------|----------|----------|----------|
| 1   | C      | -6.00124 | -4.07936 | -0.5792  |
| 2   | C      | -7.22448 | -4.73893 | -0.44846 |
| 3   | C      | -8.38702 | -4.02386 | -0.17466 |
| 4   | C      | -8.36582 | -2.63846 | -0.02846 |
| 5   | C      | -7.1402  | -2.00844 | -0.17024 |
| 6   | C      | -5.97027 | -2.70785 | -0.43404 |
| 7   | N      | -6.84182 | -0.64385 | -0.08277 |
| 8   | C      | -5.52456 | -0.41429 | -0.23769 |
| 9   | C      | -4.81919 | -1.73859 | -0.51019 |
| 10  | C      | -7.84449 | 0.362558 | 0.212029 |
| 11  | C      | -7.99077 | 0.610224 | 1.708249 |
| 12  | C      | -9.03492 | 1.680775 | 1.988609 |
| 13  | C      | -3.78453 | -2.06766 | 0.575385 |
| 14  | C      | -4.19829 | -1.77004 | -1.91477 |
| 15  | C      | -4.97094 | 0.853266 | -0.14087 |
| 16  | C      | -3.62283 | 1.132249 | -0.3309  |
| 17  | C      | -3.04128 | 2.39066  | -0.2589  |
| 18  | C      | -3.84174 | 3.626272 | 0.066536 |
| 19  | C      | -2.96914 | 4.771134 | 0.568196 |
| 20  | C      | -1.82188 | 5.030059 | -0.39939 |
| 21  | C      | -1.01236 | 3.784132 | -0.60906 |
| 22  | C      | -1.67185 | 2.533534 | -0.52803 |
| 23  | C      | 0.325985 | 3.8008   | -0.89321 |

| Row | Symbol | X        | Y        | Z        |
|-----|--------|----------|----------|----------|
| 24  | C      | 1.048795 | 2.608601 | -1.10755 |
| 25  | C      | 0.348218 | 1.392947 | -1.01372 |
| 26  | O      | -0.97704 | 1.395492 | -0.72774 |
| 27  | C      | 2.42451  | 2.541164 | -1.38041 |
| 28  | C      | 3.06697  | 1.337964 | -1.52832 |
| 29  | C      | 2.33507  | 0.108375 | -1.42033 |
| 30  | C      | 0.9548   | 0.169089 | -1.176   |
| 31  | O      | 2.942398 | -1.03901 | -1.51336 |
| 32  | C      | 4.541643 | 1.267092 | -1.7664  |
| 33  | N      | 5.258928 | 0.651113 | -0.6285  |
| 34  | C      | 7.222279 | -0.75681 | -0.17334 |
| 35  | C      | 3.843877 | 1.06278  | 1.350535 |
| 36  | C      | 3.085038 | 2.010567 | 2.018689 |
| 37  | C      | 1.949641 | 1.603011 | 2.700043 |
| 38  | C      | 1.606882 | 0.257293 | 2.703694 |
| 39  | C      | 2.412917 | -0.62742 | 2.012529 |
| 40  | N      | 3.505659 | -0.23139 | 1.35385  |
| 41  | C      | 8.568658 | -0.83158 | 0.146162 |
| 42  | C      | 8.164438 | -2.97732 | 1.125465 |
| 43  | C      | 6.833459 | -2.82709 | 0.787053 |
| 44  | N      | 6.376181 | -1.74391 | 0.149536 |
| 45  | Zn     | 4.396447 | -1.3257  | -0.17359 |
| 46  | C      | 6.662724 | 0.405728 | -0.95088 |
| 47  | C      | 5.107272 | 1.419979 | 0.61378  |
| 48  | H      | -5.09493 | -4.63866 | -0.78858 |
| 49  | H      | -7.26953 | -5.81707 | -0.55732 |
| 50  | H      | -9.3292  | -4.55119 | -0.06969 |
| 51  | H      | -9.27518 | -2.09236 | 0.193121 |
| 52  | H      | -7.57663 | 1.279876 | -0.31532 |
| 53  | H      | -8.78777 | 0.024049 | -0.22063 |
| 54  | H      | -8.26364 | -0.32954 | 2.199566 |
| 55  | H      | -7.01919 | 0.906787 | 2.116992 |
| 56  | H      | -9.1425  | 1.852892 | 3.061703 |
| 57  | H      | -8.75931 | 2.631876 | 1.523765 |
| 58  | H      | -10.0143 | 1.390388 | 1.597375 |
| 59  | H      | -3.40239 | -3.0781  | 0.41442  |
| 60  | H      | -2.93962 | -1.37887 | 0.55436  |
| 61  | H      | -4.23744 | -2.02688 | 1.567967 |
| 62  | H      | -4.94268 | -1.52222 | -2.67401 |
| 63  | H      | -3.36672 | -1.07095 | -2.00742 |
| 64  | H      | -3.82191 | -2.77463 | -2.1192  |
| 65  | H      | -4.3999  | 3.948142 | -0.82268 |
| 66  | H      | -4.59186 | 3.379549 | 0.82364  |
| 67  | H      | -2.22694 | 5.362391 | -1.36401 |
| 68  | H      | -1.17048 | 5.831033 | -0.04054 |
| 69  | H      | 2.986074 | 3.46858  | -1.4491  |

| Row | Symbol | X        | Y        | Z        |
|-----|--------|----------|----------|----------|
| 70  | H      | 4.945727 | 2.266633 | -1.96776 |
| 71  | H      | 4.743695 | 0.636957 | -2.63616 |
| 72  | H      | 0.725054 | -0.10174 | 3.219776 |
| 73  | H      | 2.185521 | -1.6859  | 1.962097 |
| 74  | H      | 6.10174  | -3.58732 | 1.033348 |
| 75  | H      | 7.282683 | 1.296019 | -0.80046 |
| 76  | H      | 6.724395 | 0.154323 | -2.01401 |
| 77  | H      | 5.952517 | 1.179217 | 1.266309 |
| 78  | H      | 5.146928 | 2.497238 | 0.420834 |
| 79  | O      | 3.248971 | -3.12672 | 0.163435 |
| 80  | H      | 0.383732 | -0.74632 | -1.07386 |
| 81  | H      | 0.849631 | 4.750739 | -0.957   |
| 82  | H      | -3.57172 | 5.674017 | 0.694431 |
| 83  | H      | -2.56095 | 4.515045 | 1.552522 |
| 84  | H      | -5.63708 | 1.674742 | 0.093198 |
| 85  | H      | -2.96212 | 0.311501 | -0.57498 |
| 86  | H      | 3.618502 | -4.00319 | 0.005638 |
| 87  | H      | 2.616841 | -2.96301 | -0.55386 |
| 88  | C      | 9.047015 | -1.95643 | 0.799293 |
| 89  | H      | 8.494322 | -3.87078 | 1.640614 |
| 90  | H      | 10.09728 | -2.03285 | 1.058085 |
| 91  | H      | 9.228289 | -0.01282 | -0.11655 |
| 92  | H      | 3.373436 | 3.054522 | 1.98364  |
| 93  | H      | 1.332425 | 2.329971 | 3.216607 |
| 59  | H      | -3.40239 | -3.0781  | 0.41442  |
| 60  | H      | -2.93962 | -1.37887 | 0.55436  |
| 61  | H      | -4.23744 | -2.02688 | 1.567967 |
| 62  | H      | -4.94268 | -1.52222 | -2.67401 |
| 63  | H      | -3.36672 | -1.07095 | -2.00742 |
| 64  | H      | -3.82191 | -2.77463 | -2.1192  |
| 65  | H      | -4.3999  | 3.948142 | -0.82268 |
| 66  | H      | -4.59186 | 3.379549 | 0.82364  |
| 67  | H      | -2.22694 | 5.362391 | -1.36401 |
| 68  | H      | -1.17048 | 5.831033 | -0.04054 |
| 69  | H      | 2.986074 | 3.46858  | -1.4491  |
| 70  | H      | 4.945727 | 2.266633 | -1.96776 |
| 71  | H      | 4.743695 | 0.636957 | -2.63616 |
| 72  | H      | 0.725054 | -0.10174 | 3.219776 |
| 73  | H      | 2.185521 | -1.6859  | 1.962097 |
| 74  | H      | 6.10174  | -3.58732 | 1.033348 |
| 75  | H      | 7.282683 | 1.296019 | -0.80046 |
| 76  | H      | 6.724395 | 0.154323 | -2.01401 |
| 77  | H      | 5.952517 | 1.179217 | 1.266309 |
| 78  | H      | 5.146928 | 2.497238 | 0.420834 |

| Row | Symbol | X        | Y        | Z        |
|-----|--------|----------|----------|----------|
| 79  | O      | 3.248971 | -3.12672 | 0.163435 |
| 80  | H      | 0.383732 | -0.74632 | -1.07386 |
| 81  | H      | 0.849631 | 4.750739 | -0.957   |
| 82  | H      | -3.57172 | 5.674017 | 0.694431 |
| 83  | H      | -2.56095 | 4.515045 | 1.552522 |
| 84  | H      | -5.63708 | 1.674742 | 0.093198 |
| 85  | H      | -2.96212 | 0.311501 | -0.57498 |
| 86  | H      | 3.618502 | -4.00319 | 0.005638 |
| 87  | H      | 2.616841 | -2.96301 | -0.55386 |
| 88  | C      | 9.047015 | -1.95643 | 0.799293 |
| 89  | H      | 8.494322 | -3.87078 | 1.640614 |
| 90  | H      | 10.09728 | -2.03285 | 1.058085 |
| 91  | H      | 9.228289 | -0.01282 | -0.11655 |
| 92  | H      | 3.373436 | 3.054522 | 1.98364  |
| 93  | H      | 1.332425 | 2.329971 | 3.216607 |



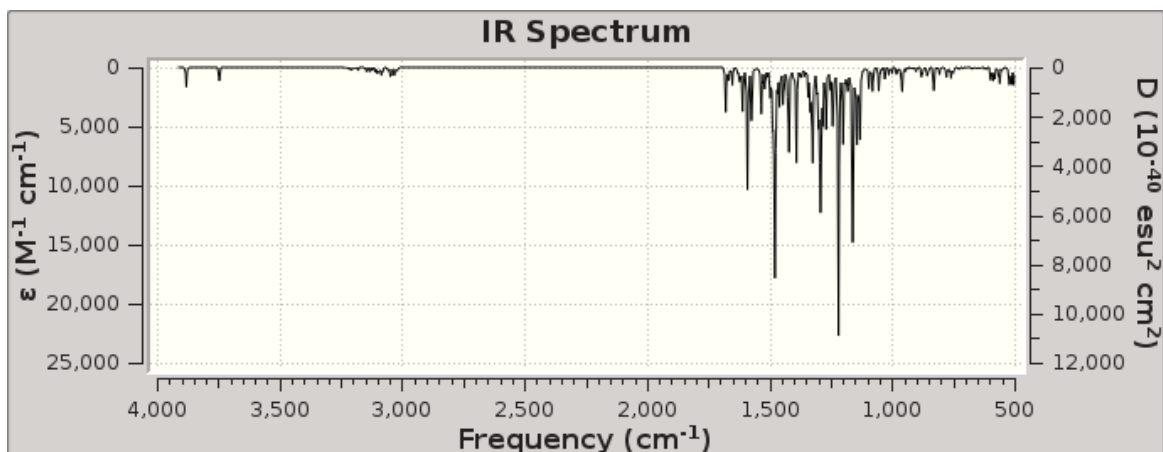

Figure S15. Calculated IR spectrum for probe A + Zn(OH<sub>2</sub>)<sup>2+</sup>.

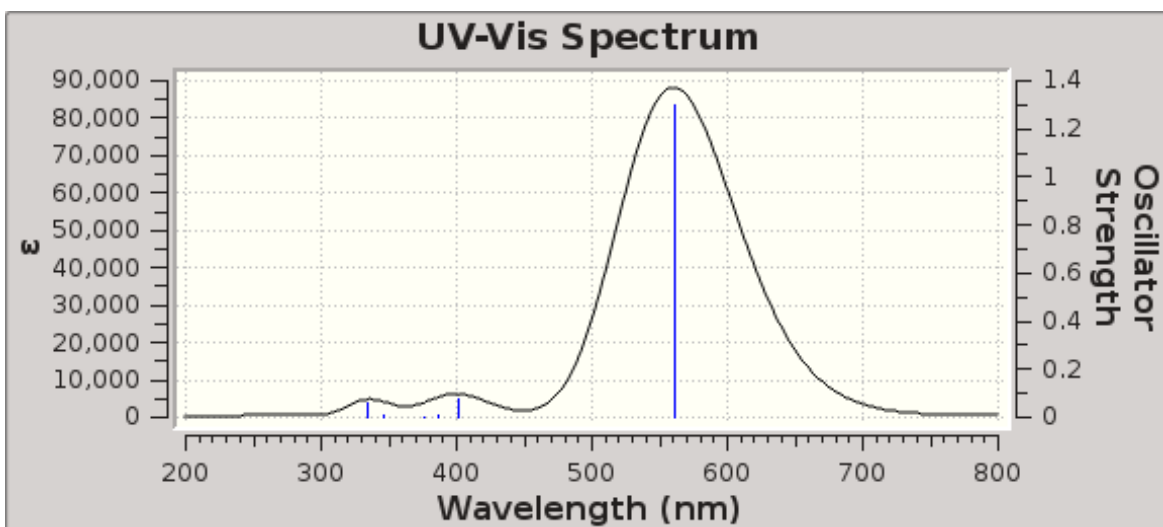

Figure S16. Calculated UV-Vis spectrum for probe A + Zn(OH<sub>2</sub>)<sup>2+</sup>.

**Table S2.** Excitation energies and oscillator strengths listing for probe **A + Zn(OH)<sub>2</sub><sup>2+</sup>**.

| <b>Excited State</b> | <b>Nature</b> | <b>E (eV)</b> | <b><math>\lambda</math> (nm)</b> | <b><math>f</math></b> | <b>Orbital transitions</b>                                                                       | <b>Normalized coefficient</b>              |
|----------------------|---------------|---------------|----------------------------------|-----------------------|--------------------------------------------------------------------------------------------------|--------------------------------------------|
| 1                    | Singlet-A     | 2.2105        | 560.88                           | 1.3017                | 185 $\rightarrow$ 186                                                                            | 0.70536                                    |
| 2                    | Singlet-A     | 3.0874        | 401.59                           | 0.0791                | 183 $\rightarrow$ 186<br>184 $\rightarrow$ 186<br>185 $\rightarrow$ 188                          | 0.14369<br>0.67231<br>0.10181              |
| 3                    | Singlet-A     | 3.2102        | 386.22                           | 0.0073                | 185 $\rightarrow$ 187<br>185 $\rightarrow$ 188                                                   | -0.46017<br>0.52061                        |
| 4                    | Singlet-A     | 3.2907        | 376.77                           | 0.0013                | 185 $\rightarrow$ 187<br>185 $\rightarrow$ 188                                                   | 0.52708<br>0.45346                         |
| 5                    | Singlet-A     | 3.5768        | 346.63                           | 0.0104                | 183 $\rightarrow$ 186<br>184 $\rightarrow$ 186<br>185 $\rightarrow$ 189<br>185 $\rightarrow$ 190 | 0.58152<br>-0.10464<br>0.33914<br>-0.10298 |
| 6                    | Singlet-A     | 3.7041        | 334.72                           | 0.0562                | 183 $\rightarrow$ 186<br>185 $\rightarrow$ 189<br>185 $\rightarrow$ 190<br>185 $\rightarrow$ 191 | -0.28429<br>0.49263<br>0.25723<br>-0.30559 |

Theoretical Data for probe A + Zn(OH<sub>2</sub>)<sub>2</sub><sup>2+</sup>

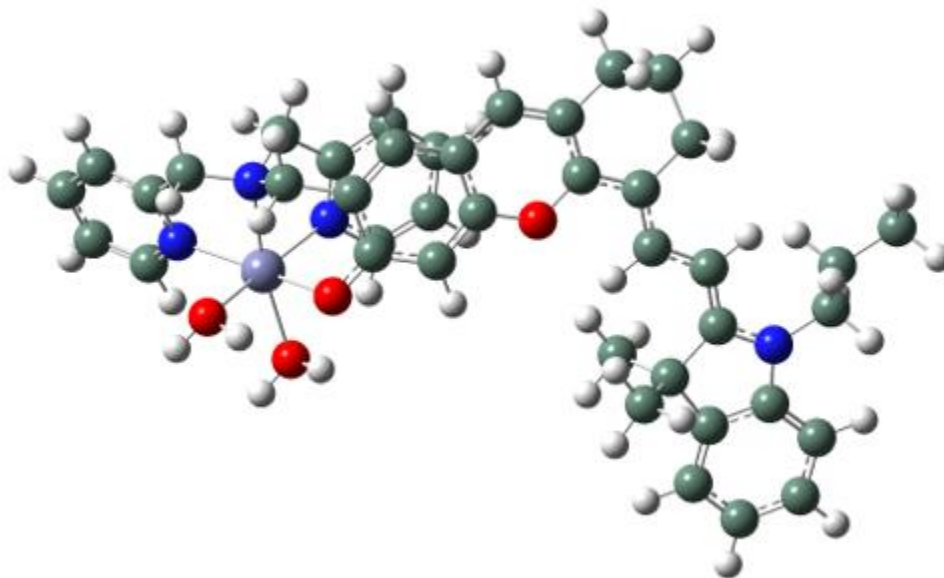

Figure S17. GaussView representation of probe A + Zn(OH<sub>2</sub>)<sub>2</sub><sup>2+</sup>.

| zna3 (Optimization completed)                       |                                 |              |
|-----------------------------------------------------|---------------------------------|--------------|
| /home/rluck/calculation/liu/mingxi/superior/zna3... |                                 |              |
| File Type                                           | .log                            |              |
| Calculation Type                                    | FREQ                            |              |
| Calculation Method                                  | RAPFD                           |              |
| Basis Set                                           | 6-311+G(2d,p)                   |              |
| Charge                                              | 2                               |              |
| Spin                                                | Singlet                         |              |
| Solvation                                           | scrf=solvent=water              |              |
| E(RAPFD)                                            | -3887.894409                    | Hartree      |
| RMS Gradient Norm                                   | 0.000006                        | Hartree/Bohr |
| Imaginary Freq                                      |                                 |              |
| Dipole Moment                                       | 15.969840                       | Debye        |
| Point Group                                         | C1                              |              |
| Job cpu time:                                       | 24 days 8 hours 28 minutes 6... |              |

Figure S18. Illustration of the computational results for probe A + Zn(OH<sub>2</sub>)<sub>2</sub><sup>2+</sup>.

Table S3. Calculated atomic coordinates for probe A + Zn(OH<sub>2</sub>)<sub>2</sub><sup>2+</sup>.

| Row | Symbol | X        | Y        | Z        |
|-----|--------|----------|----------|----------|
| 1   | C      | -5.83834 | -4.07314 | -0.58017 |
| 2   | C      | -7.02655 | -4.78335 | -0.40013 |
| 3   | C      | -8.20427 | -4.11817 | -0.07122 |

| Row | Symbol | X        | Y        | Z        |
|-----|--------|----------|----------|----------|
| 4   | C      | -8.23351 | -2.73371 | 0.082142 |
| 5   | C      | -7.0424  | -2.05285 | -0.10974 |
| 6   | C      | -5.85719 | -2.70211 | -0.42825 |
| 7   | N      | -6.79774 | -0.67771 | -0.02741 |
| 8   | C      | -5.49849 | -0.39254 | -0.23751 |
| 9   | C      | -4.75068 | -1.68572 | -0.54589 |
| 10  | C      | -7.82616 | 0.283528 | 0.323531 |
| 11  | C      | -7.91406 | 0.510745 | 1.827704 |
| 12  | C      | -8.98735 | 1.534208 | 2.167639 |
| 13  | C      | -3.66216 | -1.97559 | 0.497966 |
| 14  | C      | -4.18347 | -1.68806 | -1.97317 |
| 15  | C      | -4.99312 | 0.894825 | -0.14943 |
| 16  | C      | -3.66396 | 1.228029 | -0.38496 |
| 17  | C      | 3.11365  | 2.496398 | -0.27082 |
| 18  | C      | -3.92431 | 3.690608 | 0.164528 |
| 19  | C      | -3.06116 | 4.784754 | 0.782922 |
| 20  | C      | -1.91416 | 5.151361 | -0.14975 |
| 21  | C      | -1.1005  | 3.939212 | -0.49671 |
| 22  | C      | -1.7535  | 2.685515 | -0.56278 |
| 23  | C      | 0.245497 | 3.988483 | -0.74259 |
| 24  | C      | 0.977894 | 2.829719 | -1.06948 |
| 25  | C      | 0.274495 | 1.614874 | -1.16288 |
| 26  | O      | -1.05859 | 1.586242 | -0.91803 |
| 27  | C      | 2.370091 | 2.783728 | -1.24817 |
| 28  | C      | 3.021541 | 1.600462 | -1.48663 |
| 29  | C      | 2.281076 | 0.375517 | -1.61864 |
| 30  | C      | 0.885209 | 0.420787 | -1.46325 |
| 31  | O      | 2.895949 | -0.74794 | -1.81115 |
| 32  | C      | 4.515455 | 1.531236 | -1.4939  |
| 33  | N      | 5.015449 | 0.78152  | -0.31829 |
| 34  | C      | 6.936033 | -0.47967 | 0.527077 |
| 35  | C      | 3.197388 | 0.786662 | 1.355536 |
| 36  | C      | 2.219124 | 1.571742 | 1.947841 |
| 37  | C      | 1.020377 | 0.98533  | 2.318613 |
| 38  | C      | 0.834604 | -0.37296 | 2.097531 |
| 39  | C      | 1.856844 | -1.08674 | 1.499803 |
| 40  | N      | 3.010683 | -0.51975 | 1.137774 |
| 41  | C      | 8.167789 | -0.4555  | 1.162419 |
| 42  | C      | 8.561375 | -1.55351 | 1.911479 |
| 43  | C      | 7.708012 | -2.6436  | 2.015506 |
| 44  | C      | 6.490779 | -2.58912 | 1.36195  |
| 45  | N      | 6.117474 | -1.53389 | 0.632438 |

| Row | Symbol | X        | Y        | Z        |
|-----|--------|----------|----------|----------|
| 46  | Zn     | 4.299577 | -1.26826 | -0.36705 |
| 47  | O      | 5.443859 | -1.62484 | -2.25423 |
| 48  | C      | 6.472281 | 0.661312 | -0.34067 |
| 49  | C      | 4.536961 | 1.345799 | 0.953225 |
| 50  | H      | -4.91995 | -4.5939  | -0.832   |
| 51  | H      | -7.03189 | -5.86196 | -0.51337 |
| 52  | H      | -9.1184  | -4.68446 | 0.072013 |
| 53  | H      | -9.15357 | -2.22622 | 0.347092 |
| 54  | H      | -7.62026 | 1.21613  | -0.20482 |
| 55  | H      | -8.77365 | -0.08949 | -0.06997 |
| 56  | H      | -8.12516 | -0.4442  | 2.320185 |
| 57  | H      | -6.93786 | 0.843568 | 2.195478 |
| 58  | H      | -9.05186 | 1.691989 | 3.246392 |
| 59  | H      | -8.77312 | 2.500146 | 1.70108  |
| 60  | H      | -9.97108 | 1.206885 | 1.818879 |
| 61  | H      | -3.24308 | -2.96749 | 0.315288 |
| 62  | H      | -2.84935 | -1.25037 | 0.450784 |
| 63  | H      | -4.07841 | -1.96039 | 1.50728  |
| 64  | H      | -4.96601 | -1.46902 | -2.7023  |
| 65  | H      | -3.3849  | -0.95583 | -2.0956  |
| 66  | H      | -3.77442 | -2.6759  | -2.19598 |
| 67  | H      | -5.67995 | 1.68516  | 0.127846 |
| 68  | H      | -2.98877 | 0.43937  | -0.68779 |
| 69  | H      | -4.47507 | 4.095739 | -0.69467 |
| 70  | H      | -4.67964 | 3.370465 | 0.887453 |
| 71  | H      | -3.67078 | 5.665528 | 0.999813 |
| 72  | H      | -2.65312 | 4.431595 | 1.73681  |
| 73  | H      | -2.31997 | 5.5877   | -1.07163 |
| 74  | H      | -1.26542 | 5.909481 | 0.296367 |
| 75  | H      | 0.769315 | 4.937923 | -0.67261 |
| 76  | H      | 2.937365 | 3.703971 | -1.14027 |
| 77  | H      | 0.308371 | -0.49535 | -1.5107  |
| 78  | H      | 4.943344 | 2.54093  | -1.50147 |
| 79  | H      | 4.875937 | 1.000905 | -2.37833 |
| 80  | H      | 2.392239 | 2.631796 | 2.09116  |
| 81  | H      | 0.23389  | 1.584168 | 2.765007 |
| 82  | H      | -0.08977 | -0.86969 | 2.366031 |
| 83  | H      | 1.758581 | -2.14398 | 1.281353 |
| 84  | H      | 8.803529 | 0.417423 | 1.069969 |
| 85  | H      | 9.521112 | -1.55519 | 2.416438 |
| 86  | H      | 7.972843 | -3.51826 | 2.596585 |
| 87  | H      | 5.783385 | -3.40881 | 1.41864  |

| Row | Symbol | X        | Y        | Z        |
|-----|--------|----------|----------|----------|
| 88  | H      | 5.923497 | -2.44676 | -2.4061  |
| 89  | H      | 4.751236 | -1.57997 | -2.92577 |
| 90  | H      | 6.965357 | 1.59209  | -0.03834 |
| 91  | H      | 6.772581 | 0.450734 | -1.37099 |
| 92  | H      | 5.25767  | 1.079469 | 1.732452 |
| 93  | H      | 4.499314 | 2.438902 | 0.911592 |
| 94  | O      | 3.244548 | -3.12034 | -0.57735 |
| 95  | H      | 2.662353 | -2.82245 | -1.29402 |
| 96  | H      | 3.705809 | -3.9017  | -0.90331 |

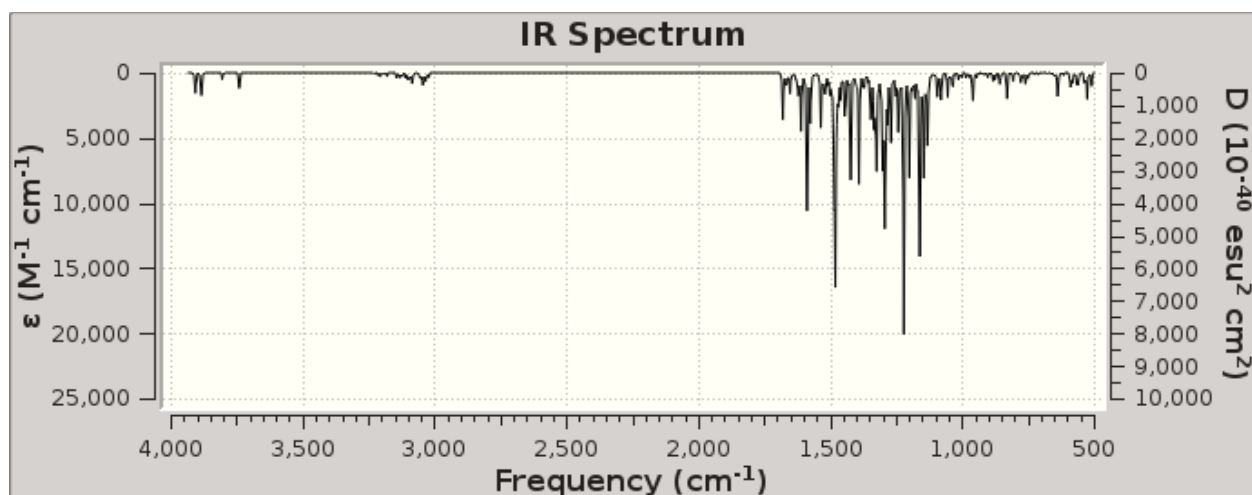

Figure S19. Calculated IR spectrum for probe A + Zn(OH<sub>2</sub>)<sub>2</sub><sup>2+</sup>.

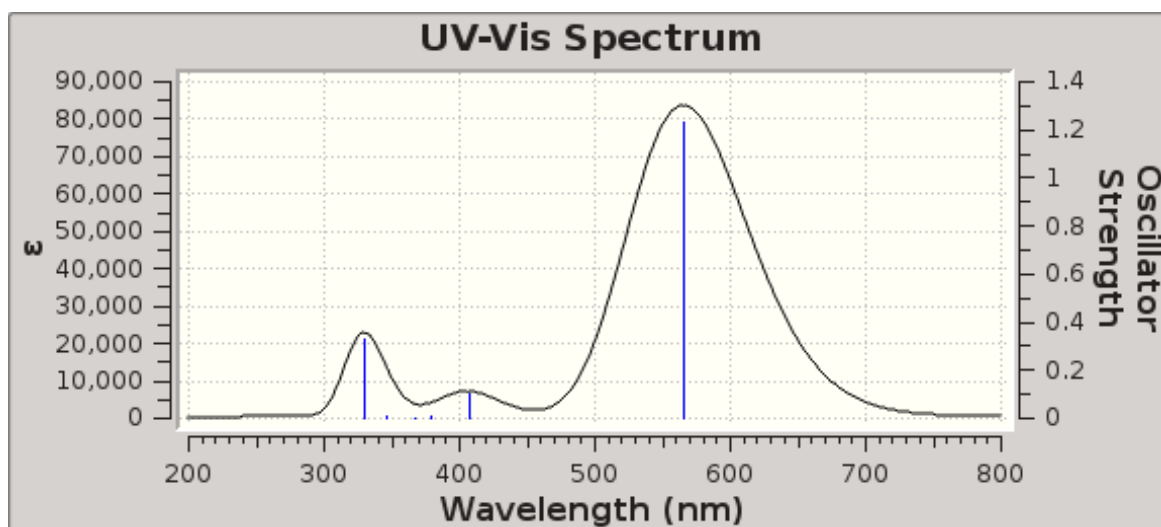

Figure S20. Calculated UV-Vis spectrum for probe A + Zn(OH<sub>2</sub>)<sub>2</sub><sup>2+</sup>.

**Table S4.** Excitation energies and oscillator strengths listing for probe A + Zn(OH<sub>2</sub>)<sub>2</sub><sup>2+</sup>.

| Excited State | Nature    | E (eV) | $\lambda$ (nm) | $f$    | Orbital transitions                                                                                                       | Normalized coefficient                                 |
|---------------|-----------|--------|----------------|--------|---------------------------------------------------------------------------------------------------------------------------|--------------------------------------------------------|
| 1             | Singlet-A | 2.1904 | 566.03         | 1.2351 | 190 $\rightarrow$ 191                                                                                                     | 0.70481                                                |
| 2             | Singlet-A | 3.0466 | 406.95         | 0.0977 | 188 $\rightarrow$ 191<br>189 $\rightarrow$ 191                                                                            | 0.13523<br>0.67983                                     |
| 3             | Singlet-A | 3.2716 | 378.98         | 0.0048 | 190 $\rightarrow$ 192<br>190 $\rightarrow$ 193                                                                            | -0.22201<br>0.66178                                    |
| 4             | Singlet-A | 3.3757 | 367.29         | 0.0023 | 190 $\rightarrow$ 192<br>190 $\rightarrow$ 193                                                                            | 0.66241<br>0.21706                                     |
| 5             | Singlet-A | 3.5757 | 346.74         | 0.0067 | 188 $\rightarrow$ 191<br>190 $\rightarrow$ 194                                                                            | 0.60338<br>-0.31082                                    |
| 6             | Singlet-A | 3.7560 | 330.10         | 0.3288 | 188 $\rightarrow$ 191<br>189 $\rightarrow$ 191<br>190 $\rightarrow$ 194<br>190 $\rightarrow$ 195<br>190 $\rightarrow$ 196 | 0.31110<br>-0.11444<br>0.56920<br>-0.15345<br>-0.12199 |



Theoretical Data for probe **B** +  $\text{Zn}(\text{OH}_2)^{2+}$ .

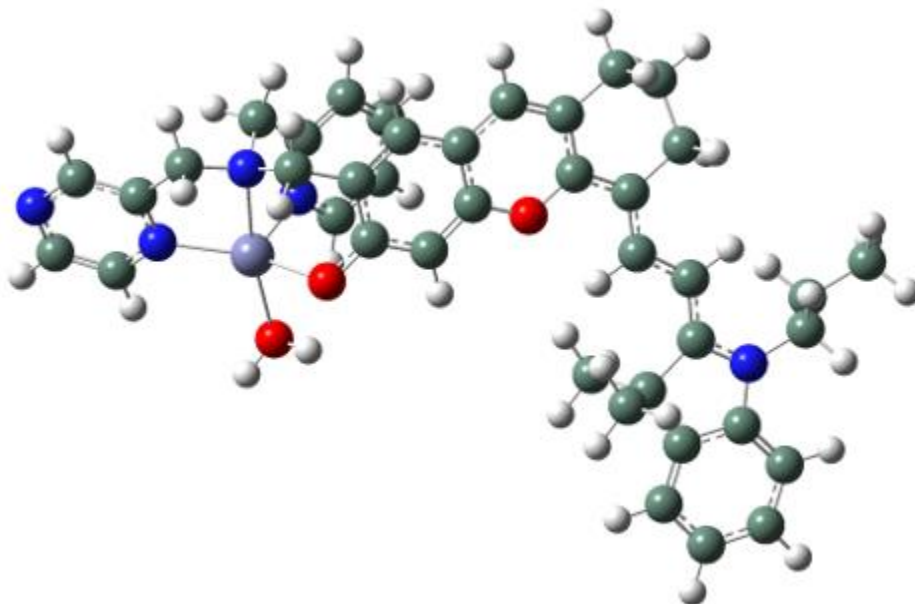

Figure S21. GaussView representation of probe **B** +  $\text{Zn}(\text{OH}_2)^{2+}$ .

| znb1 (Optimization completed)                        |                                 |              |
|------------------------------------------------------|---------------------------------|--------------|
| /home/rluck/calculation/liu/mingxi/superior/crash... |                                 |              |
| File Type                                            | .log                            |              |
| Calculation Type                                     | FREQ                            |              |
| Calculation Method                                   | RAPFD                           |              |
| Basis Set                                            | 6-311+G(2d,p)                   |              |
| Charge                                               | 2                               |              |
| Spin                                                 | Singlet                         |              |
| Solvation                                            | scrf=solvent=water              |              |
| E(RAPFD)                                             | -3827.499827                    | Hartree      |
| RMS Gradient Norm                                    | 0.000007                        | Hartree/Bohr |
| Imaginary Freq                                       |                                 |              |
| Dipole Moment                                        | 13.508812                       | Debye        |
| Point Group                                          | C1                              |              |
| Job cpu time:                                        | 20 days 3 hours 42 minutes 2... |              |

Figure S22. Illustration of the computational results for probe **B** +  $\text{Zn}(\text{OH}_2)^{2+}$ .

Table S5. Calculated atomic coordinates for probe **B** +  $\text{Zn}(\text{OH}_2)^{2+}$ .

| Row | Symbol | X        | Y        | Z        |
|-----|--------|----------|----------|----------|
| 1   | C      | -5.99445 | -4.0773  | -0.57252 |
| 2   | C      | -7.2171  | -4.73779 | -0.44135 |
| 3   | C      | -8.38073 | -4.02333 | -0.17051 |
| 4   | C      | -8.36121 | -2.63758 | -0.02775 |

| Row | Symbol | X        | Y        | Z        |
|-----|--------|----------|----------|----------|
| 5   | C      | -7.13609 | -2.0067  | -0.16983 |
| 6   | C      | -5.96516 | -2.70538 | -0.43073 |
| 7   | N      | -6.83917 | -0.64145 | -0.08531 |
| 8   | C      | -5.52233 | -0.41094 | -0.23933 |
| 9   | C      | -4.81516 | -1.73502 | -0.50813 |
| 10  | C      | -7.84355 | 0.364295 | 0.206317 |
| 11  | C      | -7.99277 | 0.613389 | 1.701986 |
| 12  | C      | -9.03977 | 1.681927 | 1.979319 |
| 13  | C      | -3.78106 | -2.0605  | 0.579093 |
| 14  | C      | -4.19315 | -1.76899 | -1.91219 |
| 15  | C      | -4.96979 | 0.857664 | -0.14481 |
| 16  | C      | -3.62188 | 1.136105 | -0.334   |
| 17  | C      | -3.03931 | 2.394616 | -0.26439 |
| 18  | C      | -3.83876 | 3.631797 | 0.057192 |
| 19  | C      | -2.96528 | 4.776587 | 0.557573 |
| 20  | C      | -1.81598 | 5.031784 | -0.40869 |
| 21  | C      | -1.00759 | 3.784444 | -0.61416 |
| 22  | C      | -1.66977 | 2.534811 | -0.53182 |
| 23  | C      | 0.330972 | 3.798278 | -0.89577 |
| 24  | C      | 1.052221 | 2.603884 | -1.1071  |
| 25  | C      | 0.348904 | 1.390053 | -1.01261 |
| 26  | O      | -0.9765  | 1.395265 | -0.72844 |
| 27  | C      | 2.427846 | 2.533277 | -1.37869 |
| 28  | C      | 3.067239 | 1.327861 | -1.52519 |
| 29  | C      | 2.332282 | 0.101116 | -1.41707 |
| 30  | C      | 0.952648 | 0.164416 | -1.17315 |
| 31  | O      | 2.938226 | -1.0479  | -1.51018 |
| 32  | C      | 4.541123 | 1.250894 | -1.76433 |
| 33  | N      | 5.258721 | 0.636234 | -0.62355 |
| 34  | C      | 7.218096 | -0.76605 | -0.17564 |
| 35  | C      | 3.843877 | 1.056773 | 1.354188 |
| 36  | C      | 3.086876 | 2.006912 | 2.020729 |
| 37  | C      | 1.952595 | 1.601834 | 2.705387 |
| 38  | C      | 1.609189 | 0.256309 | 2.713892 |
| 39  | C      | 2.413074 | -0.63108 | 2.023958 |
| 40  | N      | 3.504939 | -0.23716 | 1.362013 |
| 41  | C      | 8.568497 | -0.86078 | 0.14372  |
| 42  | C      | 8.235997 | -2.88808 | 1.095852 |
| 43  | C      | 6.884067 | -2.81121 | 0.804747 |
| 44  | N      | 6.386553 | -1.7516  | 0.167668 |
| 45  | Zn     | 4.380354 | -1.33905 | -0.1622  |
| 46  | C      | 6.662795 | 0.397526 | -0.94824 |

| Row | Symbol | X        | Y        | Z        |
|-----|--------|----------|----------|----------|
| 47  | C      | 5.106846 | 1.411359 | 0.616045 |
| 48  | H      | -5.08735 | -4.63615 | -0.77962 |
| 49  | H      | -7.26088 | -5.81624 | -0.54754 |
| 50  | H      | -9.32242 | -4.55147 | -0.06518 |
| 51  | H      | -9.27137 | -2.09189 | 0.191506 |
| 52  | H      | -7.57574 | 1.281231 | -0.32165 |
| 53  | H      | -8.78557 | 0.024079 | -0.22772 |
| 54  | H      | -8.26437 | -0.32638 | 2.193981 |
| 55  | H      | -7.02249 | 0.912578 | 2.111908 |
| 56  | H      | -9.14928 | 1.855243 | 3.05202  |
| 57  | H      | -8.7657  | 2.63302  | 1.513569 |
| 58  | H      | -10.0179 | 1.388704 | 1.587074 |
| 59  | H      | -3.39803 | -3.07103 | 0.420879 |
| 60  | H      | -2.93666 | -1.37115 | 0.557031 |
| 61  | H      | -4.2348  | -2.01765 | 1.571208 |
| 62  | H      | -4.93726 | -1.52381 | -2.67255 |
| 63  | H      | -3.36234 | -1.06916 | -2.00585 |
| 64  | H      | -3.8155  | -2.77363 | -2.11393 |
| 65  | H      | -4.39528 | 3.952357 | -0.8335  |
| 66  | H      | -4.59022 | 3.387612 | 0.81379  |
| 67  | H      | -2.21901 | 5.362062 | -1.37485 |
| 68  | H      | -1.16428 | 5.832912 | -0.05077 |
| 69  | H      | 2.991561 | 3.459275 | -1.44836 |
| 70  | H      | 4.949563 | 2.247828 | -1.9685  |
| 71  | H      | 4.740243 | 0.61655  | -2.6316  |
| 72  | H      | 0.728208 | -0.10067 | 3.232769 |
| 73  | H      | 2.184925 | -1.68949 | 1.976951 |
| 74  | H      | 7.282901 | 1.287036 | -0.79392 |
| 75  | H      | 6.727839 | 0.149396 | -2.01198 |
| 76  | H      | 5.95196  | 1.175869 | 1.270576 |
| 77  | H      | 5.145598 | 2.487307 | 0.416915 |
| 78  | O      | 3.222746 | -3.12676 | 0.161587 |
| 79  | H      | 0.379258 | -0.74952 | -1.07098 |
| 80  | H      | 0.8565   | 4.747095 | -0.9604  |
| 81  | H      | -3.56673 | 5.680639 | 0.680691 |
| 82  | H      | -2.55912 | 4.522205 | 1.543174 |
| 83  | H      | -5.63661 | 1.679295 | 0.086762 |
| 84  | H      | -2.9612  | 0.314559 | -0.57535 |
| 85  | H      | 3.574662 | -4.00958 | -0.00114 |
| 86  | H      | 2.593098 | -2.9466  | -0.55454 |
| 87  | N      | 9.078246 | -1.9123  | 0.769853 |
| 88  | H      | 3.37593  | 3.05052  | 1.982236 |

| <b>Row</b> | <b>Symbol</b> | <b>X</b> | <b>Y</b> | <b>Z</b> |
|------------|---------------|----------|----------|----------|
| 89         | H             | 1.336735 | 2.330638 | 3.220908 |
| 90         | H             | 9.247335 | -0.05506 | -0.11769 |
| 91         | H             | 6.196861 | -3.59821 | 1.088378 |
| 92         | H             | 8.639865 | -3.75285 | 1.610515 |

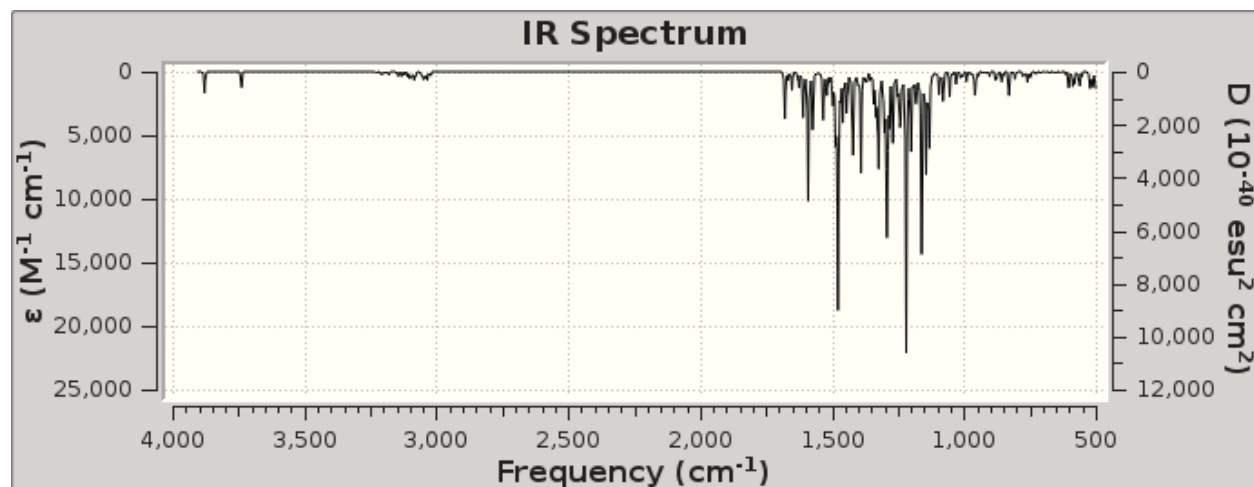

Figure S23. Calculated UV-Vis spectrum for probe **B** +  $\text{Zn}(\text{OH}_2)^{2+}$ .

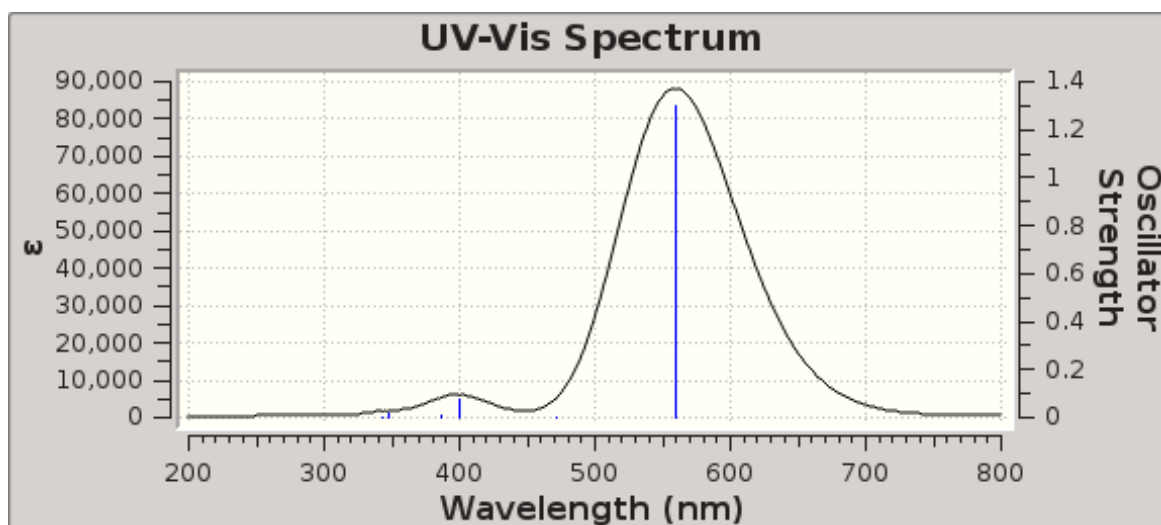

Figure S24. Calculated UV-Vis spectrum for probe **B** +  $\text{Zn}(\text{OH}_2)^{2+}$ .

Table S6. Excitation energies and oscillator strengths listing for probe **B** +  $\text{Zn}(\text{OH}_2)^{2+}$ .

| Excited State | Nature    | E (eV) | $\lambda$ (nm) | $f$    | Orbital transitions                                                     | Normalized coefficient         |
|---------------|-----------|--------|----------------|--------|-------------------------------------------------------------------------|--------------------------------|
| 1             | Singlet-A | 2.2142 | 559.96         | 1.3007 | 185 $\rightarrow$ 186                                                   | 0.70537                        |
| 2             | Singlet-A | 2.6276 | 471.85         | 0.0002 | 185 $\rightarrow$ 187                                                   | 0.70345                        |
| 3             | Singlet-A | 3.0961 | 400.45         | 0.0763 | 183 $\rightarrow$ 186<br>184 $\rightarrow$ 186<br>185 $\rightarrow$ 188 | 0.14237<br>0.66917<br>-0.12017 |
| 4             | Singlet-A | 3.2110 | 386.13         | 0.0088 | 184 $\rightarrow$ 186<br>185 $\rightarrow$ 188                          | 0.11209<br>0.68637             |

|   |           |        |        |        |           |          |
|---|-----------|--------|--------|--------|-----------|----------|
| 5 | Singlet-A | 3.5704 | 347.26 | 0.0143 | 183 → 186 | 0.49214  |
|   |           |        |        |        | 184 → 187 | 0.10203  |
|   |           |        |        |        | 185 → 189 | -0.27024 |
|   |           |        |        |        | 185 → 190 | 0.34722  |
|   |           |        |        |        | 185 → 191 | -0.15623 |
| 6 | Singlet-A | 3.6060 | 343.82 | 0.0034 | 183 → 186 | -0.11648 |
|   |           |        |        |        | 184 → 187 | 0.67675  |

Theoretical Data for probe **B** +  $\text{Zn}(\text{OH}_2)_2^{2+}$ .

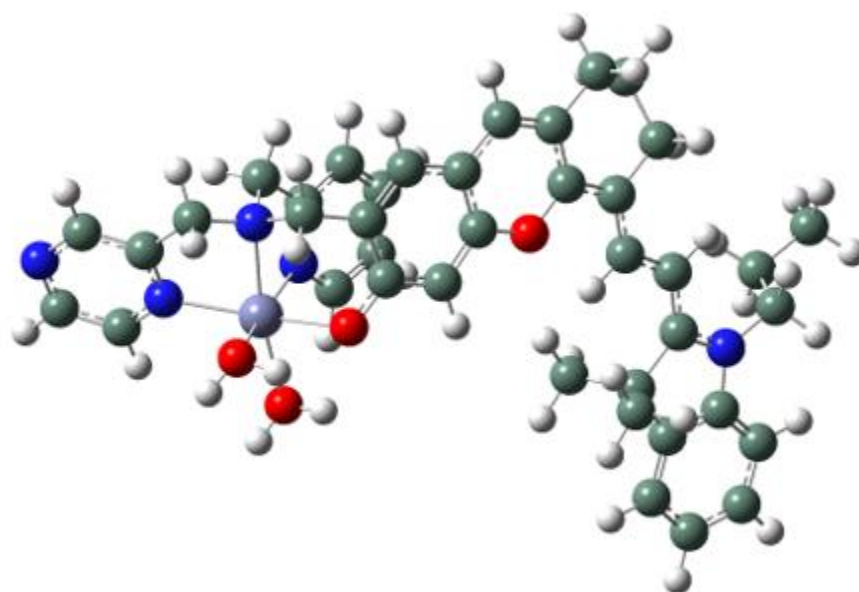

Figure S25. GaussView representation of probe **B** +  $\text{Zn}(\text{OH}_2)_2^{2+}$ .

| znb3                                                 |                    |              |
|------------------------------------------------------|--------------------|--------------|
| /home/rluck/calculation/liu/mingxi/superior/znb3.... |                    |              |
| File Type                                            | .chk               |              |
| Calculation Type                                     | FREQ               |              |
| Calculation Method                                   | RAPFD              |              |
| Basis Set                                            | 6-311+G(2D,P)      |              |
| Charge                                               | 2                  |              |
| Spin                                                 | Singlet            |              |
| Solvation                                            | scrf=solvent=water |              |
| Electronic Energy                                    | -3903.916112       | Hartree      |
| RMS Gradient Norm                                    | 0.000004           | Hartree/Bohr |
| Imaginary Freq                                       | 0                  |              |
| Dipole Moment                                        | 12.410141          | Debye        |
| Polarizability ( $\alpha$ )                          | 986.301767         | a.u.         |
| Point Group                                          |                    |              |

Figure S26. Illustration of the computational results for probe **B** +  $\text{Zn}(\text{OH}_2)_{2^{2+}}$ .

Table S7. Computational results for probe **B** +  $\text{Zn}(\text{OH}_2)_{2^{2+}}$ .

| Row | Symbol | X        | Y        | Z        |
|-----|--------|----------|----------|----------|
| 1   | C      | -5.81071 | -4.0715  | -0.58159 |
| 2   | C      | -6.99603 | -4.78582 | -0.39896 |
| 3   | C      | -8.17557 | -4.12479 | -0.06817 |
| 4   | C      | -8.20953 | -2.7404  | 0.084604 |
| 5   | C      | -7.0212  | -2.05548 | -0.10981 |
| 6   | C      | -5.83426 | -2.70046 | -0.43027 |
| 7   | N      | -6.78134 | -0.67929 | -0.02848 |
| 8   | C      | -5.48394 | -0.38952 | -0.24128 |
| 9   | C      | -4.73181 | -1.68002 | -0.55047 |
| 10  | C      | -7.81287 | 0.27784  | 0.324851 |
| 11  | C      | -7.89985 | 0.502236 | 1.82949  |
| 12  | C      | -8.97841 | 1.519104 | 2.172484 |
| 13  | C      | -3.64041 | -1.96538 | 0.491719 |
| 14  | C      | -4.16721 | -1.68122 | -1.97882 |
| 15  | C      | -4.98276 | 0.899973 | -0.1542  |
| 16  | C      | -3.65533 | 1.236275 | -0.39236 |
| 17  | C      | -3.10595 | 2.505361 | -0.27678 |
| 18  | C      | -3.91612 | 3.697823 | 0.163945 |
| 19  | C      | -3.05222 | 4.78897  | 0.786711 |
| 20  | C      | -1.90492 | 5.158839 | -0.14444 |

| Row | Symbol | X        | Y        | Z        |
|-----|--------|----------|----------|----------|
| 21  | C      | -1.09159 | 3.947856 | -0.49598 |
| 22  | C      | -1.74657 | 2.694993 | -0.56959 |
| 23  | C      | 0.254816 | 3.996228 | -0.73748 |
| 24  | C      | 0.986455 | 2.837373 | -1.06858 |
| 25  | C      | 0.280583 | 1.62512  | -1.17306 |
| 26  | O      | -1.05311 | 1.597314 | -0.93255 |
| 27  | C      | 2.379098 | 2.788981 | -1.24086 |
| 28  | C      | 3.02838  | 1.604968 | -1.48394 |
| 29  | C      | 2.28525  | 0.383867 | -1.6288  |
| 30  | C      | 0.889253 | 0.43151  | -1.48004 |
| 31  | O      | 2.89803  | -0.74118 | -1.82567 |
| 32  | C      | 4.521831 | 1.530175 | -1.48228 |
| 33  | N      | 5.011191 | 0.773902 | -0.30444 |
| 34  | C      | 6.91555  | -0.49413 | 0.542833 |
| 35  | C      | 3.181047 | 0.777282 | 1.356648 |
| 36  | C      | 2.200357 | 1.56072  | 1.946605 |
| 37  | C      | 0.998933 | 0.973664 | 2.307767 |
| 38  | C      | 0.813093 | -0.3835  | 2.079991 |
| 39  | C      | 1.837785 | -1.09604 | 1.485247 |
| 40  | N      | 2.994237 | -0.52815 | 1.132512 |
| 41  | C      | 8.142448 | -0.50018 | 1.196968 |
| 42  | N      | 8.552149 | -1.53064 | 1.925101 |
| 43  | C      | 7.729098 | -2.57081 | 2.017291 |
| 44  | C      | 6.495739 | -2.58202 | 1.38491  |
| 45  | N      | 6.101355 | -1.54495 | 0.650423 |
| 46  | Zn     | 4.266363 | -1.27188 | -0.37651 |
| 47  | O      | 5.458771 | -1.63496 | -2.22011 |
| 48  | C      | 6.467955 | 0.655009 | -0.31676 |
| 49  | C      | 4.523559 | 1.336702 | 0.965257 |
| 50  | H      | -4.89097 | -4.58914 | -0.8349  |
| 51  | H      | -6.99769 | -5.86449 | -0.51169 |
| 52  | H      | -9.08736 | -4.69434 | 0.077005 |
| 53  | H      | -9.13088 | -2.23603 | 0.350995 |
| 54  | H      | -7.6109  | 1.211916 | -0.20232 |
| 55  | H      | -8.75936 | -0.09816 | -0.06825 |
| 56  | H      | -8.10492 | -0.45462 | 2.320805 |
| 57  | H      | -6.92497 | 0.839938 | 2.19634  |
| 58  | H      | -9.04188 | 1.675237 | 3.251534 |
| 59  | H      | -8.77064 | 2.486804 | 1.706675 |
| 60  | H      | -9.96084 | 1.186437 | 1.825109 |
| 61  | H      | -3.21793 | -2.95573 | 0.308525 |
| 62  | H      | -2.8304  | -1.23713 | 0.443114 |



| Row | Symbol | X        | Y        | Z        |
|-----|--------|----------|----------|----------|
| 63  | H      | -4.05503 | -1.95156 | 1.501719 |
| 64  | H      | -4.95192 | -1.46569 | -2.70666 |
| 65  | H      | -3.37158 | -0.94619 | -2.10341 |
| 66  | H      | -3.75492 | -2.66771 | -2.20157 |
| 67  | H      | -5.67131 | 1.688082 | 0.125142 |
| 68  | H      | -2.97949 | 0.449231 | -0.6978  |
| 69  | H      | -4.4671  | 4.106757 | -0.69328 |
| 70  | H      | -4.67122 | 3.374781 | 0.88581  |
| 71  | H      | -3.66129 | 5.669236 | 1.007132 |
| 72  | H      | -2.64442 | 4.43172  | 1.739167 |
| 73  | H      | -2.3106  | 5.598428 | -1.06483 |
| 74  | H      | -1.25612 | 5.915231 | 0.30445  |
| 75  | H      | 0.780218 | 4.944211 | -0.66035 |
| 76  | H      | 2.948471 | 3.706806 | -1.12411 |
| 77  | H      | 0.310157 | -0.48268 | -1.53629 |
| 78  | H      | 4.954295 | 2.537681 | -1.48264 |
| 79  | H      | 4.886271 | 1.001124 | -2.36581 |
| 80  | H      | 2.373703 | 2.619892 | 2.095712 |
| 81  | H      | 0.210388 | 1.571363 | 2.751977 |
| 82  | H      | -0.11338 | -0.88032 | 2.340835 |
| 83  | H      | 1.73983  | -2.15213 | 1.261533 |
| 84  | H      | 5.941645 | -2.45719 | -2.36077 |
| 85  | H      | 4.790933 | -1.58455 | -2.916   |
| 86  | H      | 6.961697 | 1.5808   | -0.00061 |
| 87  | H      | 6.77954  | 0.452301 | -1.34535 |
| 88  | H      | 5.237875 | 1.07045  | 1.750328 |
| 89  | H      | 4.486692 | 2.429652 | 0.924295 |
| 90  | O      | 3.242187 | -3.13214 | -0.57821 |
| 91  | H      | 2.659184 | -2.87768 | -1.30953 |
| 92  | H      | 3.718333 | -3.91967 | -0.86617 |
| 93  | H      | 8.803352 | 0.358195 | 1.126402 |
| 94  | H      | 5.818395 | -3.42359 | 1.468732 |
| 95  | H      | 8.051229 | -3.41725 | 2.613948 |

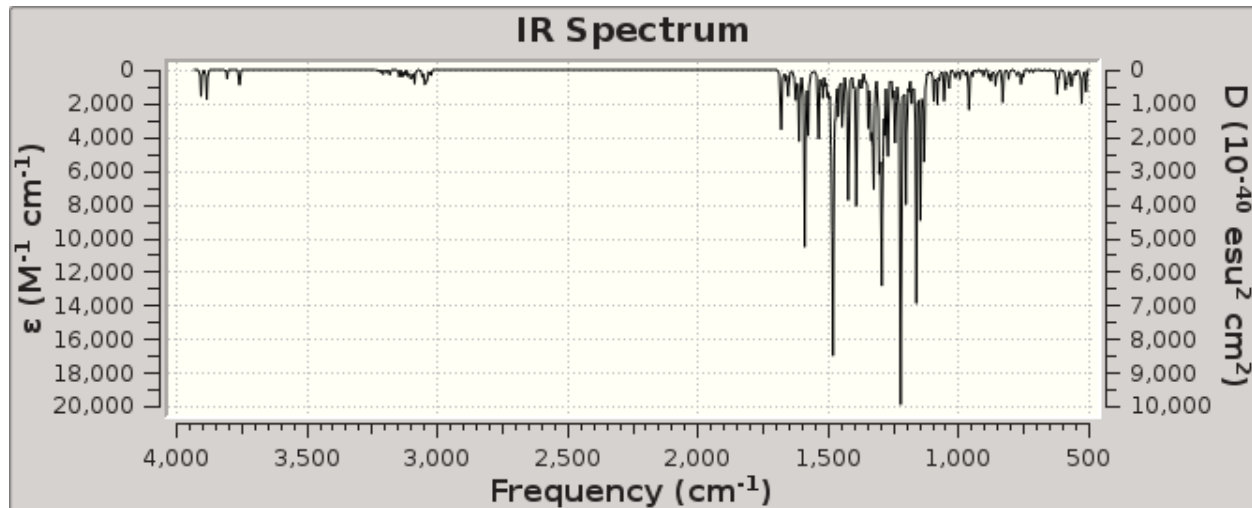

Figure S27. Calculated IR spectrum for probe **B** +  $\text{Zn}(\text{OH}_2)_2^{2+}$ .

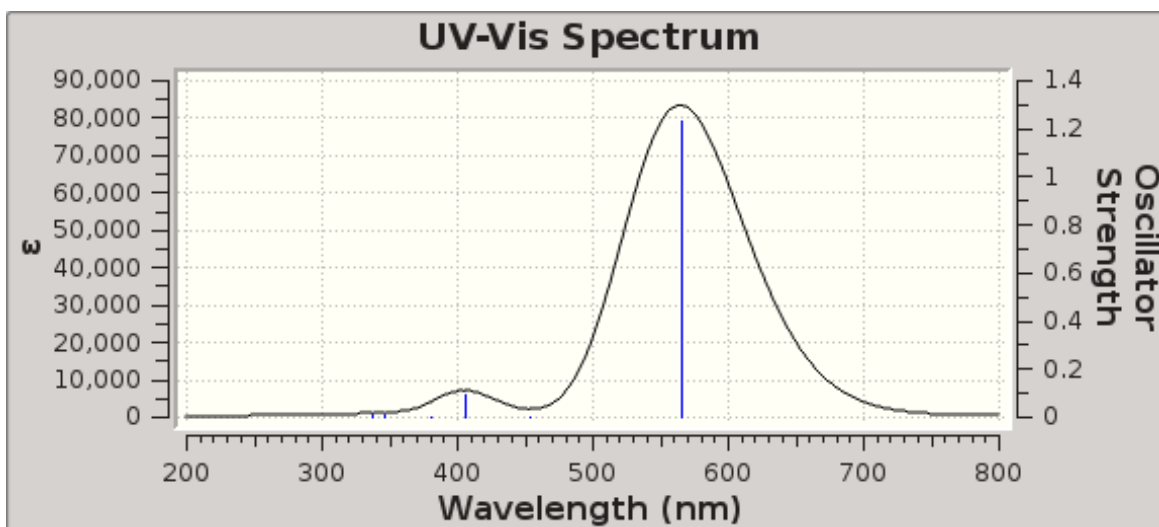

Figure S28. Calculated UV-Vis spectrum for probe **B** +  $\text{Zn}(\text{OH}_2)_2^{2+}$ .

**Table S8.** Excitation energies and oscillator strengths listing for probe **B + Zn(OH)<sub>2</sub><sup>2+</sup>**.

| <b>Excited State</b> | <b>Nature</b> | <b>E (eV)</b> | <b><math>\lambda^*(\text{nm})</math></b> | <b><math>f</math></b> | <b>Orbital transitions</b>                       | <b>Normalized coefficient</b>              |
|----------------------|---------------|---------------|------------------------------------------|-----------------------|--------------------------------------------------|--------------------------------------------|
| 1                    | Singlet-A     | 2.1942        | 565.05                                   | 1.2313                | 190 → 191                                        | 0.70479                                    |
| 2                    | Singlet-A     | 2.7348        | 453.35                                   | 0.0014                | 190 → 192                                        | 0.70339                                    |
| 3                    | Singlet-A     | 3.0550        | 405.84                                   | 0.0966                | 188 → 191<br>189 → 191                           | -0.13454<br>0.67953                        |
| 4                    | Singlet-A     | 3.2522        | 381.24                                   | 0.0039                | 190 → 193                                        | 0.69421                                    |
| 5                    | Singlet-A     | 3.5775        | 346.57                                   | 0.0084                | 188 → 191<br>190 → 194<br>190 → 195<br>190 → 196 | 0.58754<br>0.13966<br>-0.29918<br>0.11616  |
| 6                    | Singlet-A     | 3.6727        | 337.58                                   | 0.0048                | 188 → 191<br>189 → 192<br>190 → 194<br>190 → 196 | -0.16423<br>-0.31328<br>0.54901<br>0.23397 |

**Table S9.** Calculated electronic transitions (nm) and corresponding oscillator strengths (f) and their percentage contribution to the UV/Vis spectra.

| <i>Species</i>                       | <i>Transition<br/>(HOMO-1/LUMO)</i> | <i>Wavelength<br/>(nm)</i> | <i>f</i> | <i>%</i> |
|--------------------------------------|-------------------------------------|----------------------------|----------|----------|
| <i>Intermediate 4</i>                | S0-S2<br>165 → 167                  | 699                        | 1.4954   | 99.9     |
| <i>Intermediate 9</i>                | S0-S2<br>165 → 167                  | 701                        | 1.4907   | 99.8     |
| <i>probe A</i>                       | S0-S2<br>176 → 178                  | 693                        | 1.1326   | 78.9     |
| <i>probe B</i>                       | S0-S2<br>176 → 178                  | 699                        | 0.7194   | 99.9     |
| <i>Zinc Complex 4</i>                | S0-S1<br>(HOMO/LUMO)<br>180 → 181   | 744                        | 1.3627   | 99.9     |
| <i>Zinc Complex 9</i>                | S0-S2<br>179 → 181                  | 702                        | 1.3926   | 99.6     |
| <i>Zinc Complex 4 OH<sup>-</sup></i> | S0-S1<br>(HOMO/LUMO)<br>185 → 186   | 765                        | 1.2967   | 99.0     |
| <i>Zinc Complex 9 OH<sup>-</sup></i> | S0-S2<br>185 → 187                  | 711                        | 1.3857   | 99.8     |

**Table S10.** Drawings of the HOMO-1/LUMO states for Intermediates **4** and **9**, and for probes **A** and **B**.

|               | <i>Intermediate 4</i>                                                                    | <i>Intermediate 9</i>                                                                    | <i>probe A</i>                                                                            | <i>probe B</i>                                                                             |
|---------------|------------------------------------------------------------------------------------------|------------------------------------------------------------------------------------------|-------------------------------------------------------------------------------------------|--------------------------------------------------------------------------------------------|
| <i>LUMO</i>   | 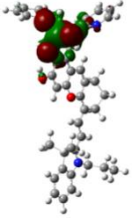<br>(a) | <br>(c) | <br>(e) | <br>(g) |
| <i>HOMO-1</i> | <br>(b) | <br>(d) | <br>(f) | <br>(h) |

**Table S11.** Drawings of the HOMO-1/LUMO distributions for the Zn complexes explored in this work. Note that exceptions are observed for (b) and (f), corresponding to Zn complex **4**, for which the excitation is predicted as an HOMO/LUMO transition.

|             | <i>Zinc complex 4</i>                                                                      | <i>Zinc complex 9</i>                                                                      | <i>Zinc complex 4 with OH<sup>-</sup></i>                                                   | <i>Zinc Complex 9 with OH<sup>-</sup></i>                                                    |
|-------------|--------------------------------------------------------------------------------------------|--------------------------------------------------------------------------------------------|---------------------------------------------------------------------------------------------|----------------------------------------------------------------------------------------------|
| <i>LUMO</i> | 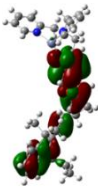<br>(a) | <br>(c) | <br>(e) | <br>(g) |

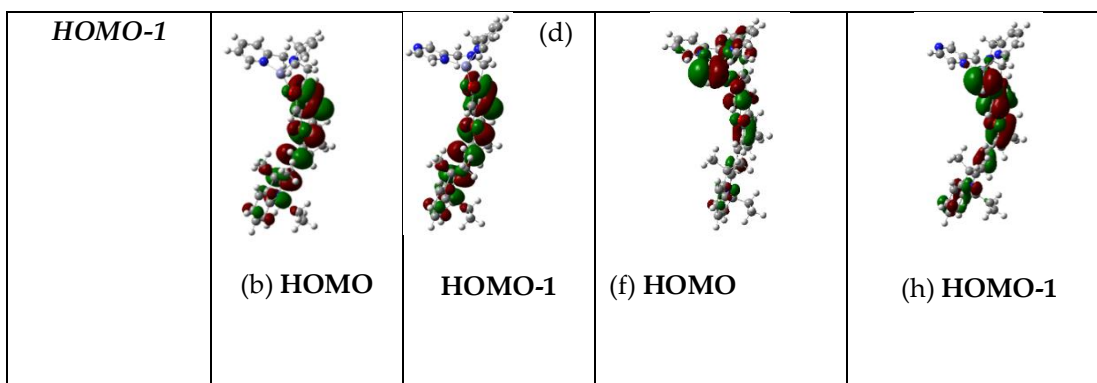

**Table S12.** Calculated electronic transitions (nm) and corresponding oscillator strengths (*f*) and their percentage contribution to the UV/Vis spectra for the  $[\text{Zn}(\text{OH}_2)]^{2+}$  and  $[\text{Zn}(\text{OH}_2)_2]^{2+}$  moieties attached to probes A and B.

| Complex                           | Excited State 1 | Wavelength (nm) | <i>f</i> | %    |
|-----------------------------------|-----------------|-----------------|----------|------|
| A $\text{Zn}(\text{OH}_2)_2^{2+}$ | 185→186         | 560.9           | 1.3017   | 99.5 |
| A $\text{Zn}(\text{OH}_2)_2^{2+}$ | 190→191         | 566.0           | 1.2351   | 99.4 |
| B $\text{Zn}(\text{OH}_2)_2^{2+}$ | 185→186         | 560.0           | 1.3007   | 99.5 |
| B $\text{Zn}(\text{OH}_2)_2^{2+}$ | 190→191         | 565.1           | 1.2313   | 99.3 |

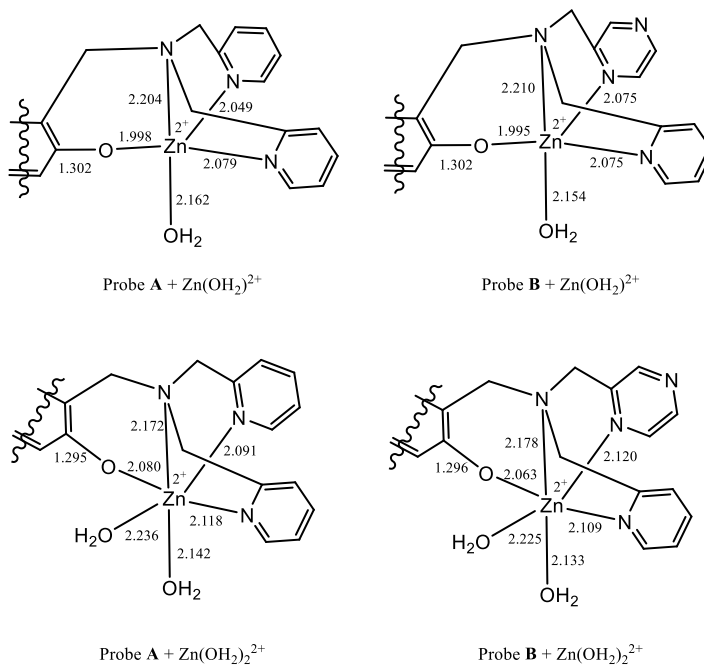

**Figure S29.** Calculated coordination bond distances (Å) for probes A and B with  $\text{Zn}(\text{OH}_2)^{2+}$  and  $\text{Zn}(\text{OH}_2)_2^{2+}$ .

## 10. Comparison of Zn concentration via atomic absorption spectroscopy and fluorescence change

The ability of the fluorescent probe A to monitor the concentration of free Zn<sup>2+</sup> ions in solution was assessed by preparing standard solutions of a known Zn<sup>2+</sup> concentration and then also measuring the concentration through fluorescence measurement with the probe. As a result, 93.1% and 99.5% accuracy was demonstrated as shown in Fig. S30.

Two stock solutions (ZnSO<sub>4</sub>, 0.0595 mg/L and 0.0424 mg/L) were prepared and tested.

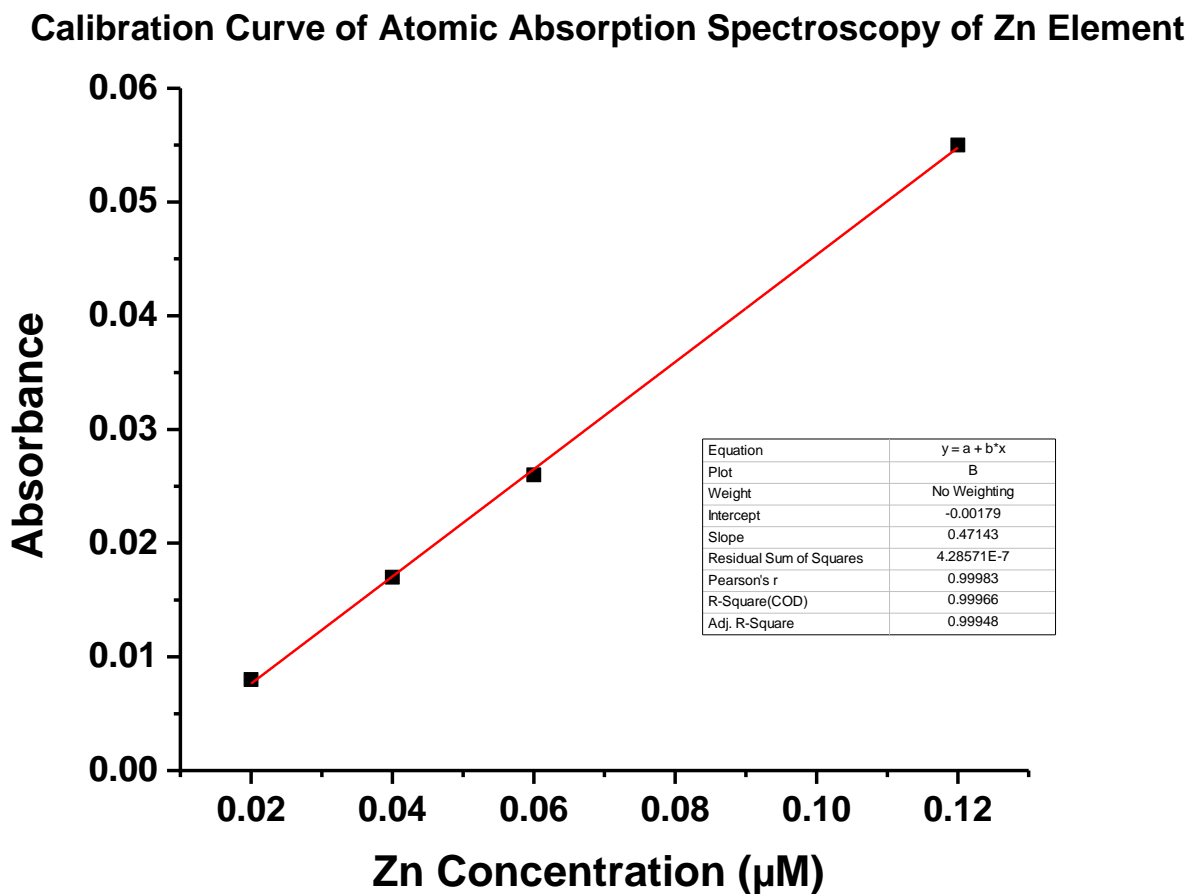

Figure S30. Calibration curve of atomic absorption spectroscopy of Zn element.

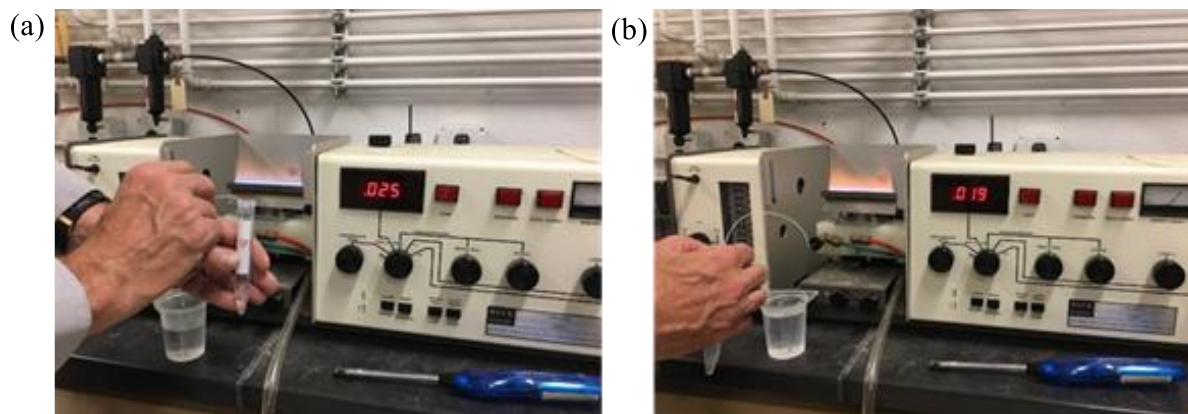

**Figure S31.** Absorption of stock solution samples obtained in atomic absorption spectroscopy and calibration curve; (a)  $Zn^{2+}$  concentration of sample 1 was calculated to be  $0.06\text{mg/L} = 0.923\mu\text{M}$ , (b) sample 2 was calculated to be  $0.0438\text{mg/L} = 0.673\mu\text{M}$ .

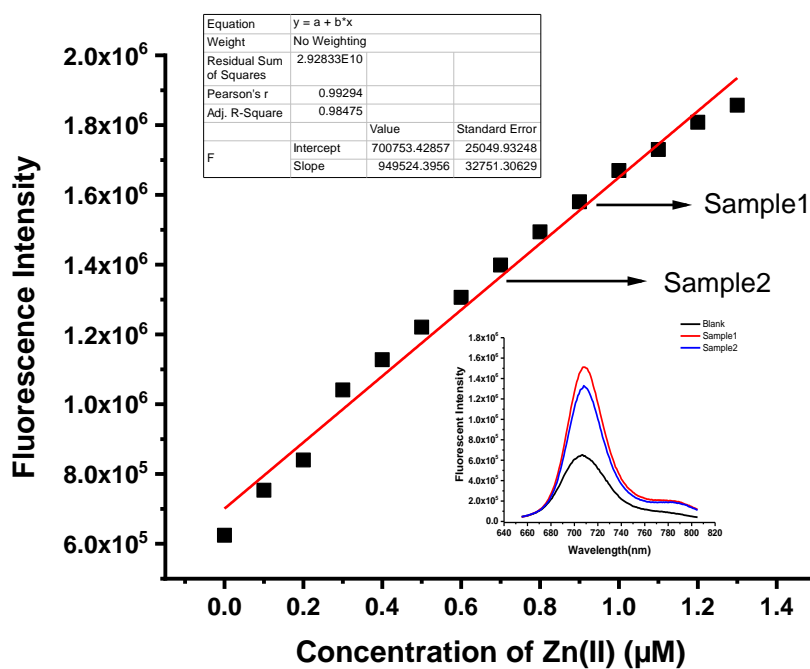

**Figure S32.** Determination of  $Zn^{2+}$  concentration according to fluorescence changes.

In order to determine the Zn concentration of the stock solution, samples were added into the solution of fluorescent probe A ( $5\mu\text{M}$ ) to measure fluorescent changes.

For sample 1, Concentration of Zn is calculated to be  $0.852\text{ uM}$ , accuracy is 93.1%.

For sample 2, Concentration of Zn is calculated to be  $0.655\text{ uM}$ , accuracy is 99.5%.



## 11. References

1. Goswami, S., et al., *A new rhodamine based colorimetric 'off-on' fluorescence sensor selective for Pd<sup>2+</sup> along with the first bound X-ray crystal structure.* Chem Commun (Camb), 2011. **47**(32): p. 9101-3.
2. Zhang, S., et al., *Near-Infrared Fluorescent probes with Large Stokes Shifts for Sensing Zn(II) Ions in Living Cells.* ACS Sens, 2016. **1**(12): p. 1408-1415.
3. Yuan, L., et al., *A unique class of near-infrared functional fluorescent dyes with carboxylic-acid-modulated fluorescence ON/OFF switching: rational design, synthesis, optical properties, theoretical calculations, and applications for fluorescence imaging in living animals.* J Am Chem Soc, 2012. **134**(2): p. 1200-11.
